# Supplementary material for: Evaluation of reanalysis soil moisture products using cosmic ray neutron sensor observations across the globe
Source: Copernicus journal article supplement (doi:10.5194/hess-28-1999-2024), 2024-05-07
Supplement: Supplementary file 2 [file StatisticMetricNEWR1.xlsx]

## Sheet: 1R
CRNS site name	Station ID	Country	ERA5-Land	CFSv2	MERRA2	JRA55	GLDAS	CRA40	GLEAM	SMAPL4
Manitou Forest Tower	USA_SITE_004	USA	0.655405	0.521355	0.75127	0.597618	0.434074	0.703955	0.745019	0.720018
Marshall Colorado	USA_SITE_006	USA	0.807074	0.639604	0.835287	0.624664	0.632589	0.831651	0.786713	0.844031
Kendall	USA_SITE_010	USA	0.67772	0.620043	0.616838	0.578181	0.671474	0.740314	0.728631	0.663763
Santa Rita Creosote	USA_SITE_011	USA	0.724118	0.711182	0.703699	0.474647	0.680627	0.820305	0.859793	0.85349
SMAP-OK	USA_SITE_014	USA	0.812631	0.738656	0.809047	0.679634	0.72112	0.782668	0.780291	0.861894
ARM-1	USA_SITE_015	USA	0.749572	0.681856	0.770407	0.603835	0.678906	0.693485	0.643959	0.769325
Iowa Validation Site	USA_SITE_016	USA	0.555899	0.411079	0.485329	0.521416	0.512144	0.531347	0.612814	0.414107
San Pedro 2	USA_SITE_020	USA	0.48778	0.83284	0.738766	0.589959	0.797279	0.781368	0.839946
Desert Chaparral UCI	USA_SITE_023	USA	0.806049	0.821663	0.766598	0.680895	0.679179	0.781041	0.849472	0.814321
Coastal Sage UCI	USA_SITE_024	USA	0.909956	0.894182	0.797258	0.783334	0.832713	0.930846	0.888065	0.909537
Chestnut Ridge NOAA	USA_SITE_025	USA	0.610363	0.729543	0.690733	0.721275	0.742474	0.796433	0.710962
Bondville	USA_SITE_026	USA	0.662409	0.596118	0.53346	0.630434	0.487882	0.619549	0.694165	0.653955
Morgan Monroe	USA_SITE_027	USA	0.783805	0.823616	0.713394	0.817432	0.651466	0.742496	0.80285
Mozark	USA_SITE_028	USA	0.746935	0.76661	0.823002	0.694855	0.75982	0.839449	0.776101	0.811983
Neb Field 3	USA_SITE_029	USA	0.680569	0.53822	0.553408	0.614618	0.548726	0.682612	0.643137	0.621454
Harvard Forest	USA_SITE_030	USA	0.752276	0.66865	0.776958	0.811981	0.635759	0.70304	0.753131	0.822547
Howland	USA_SITE_031	USA	0.746852	0.621102	0.76903	0.793863	0.795618	0.545116	0.77902	0.782906
Tonzi Ranch	USA_SITE_032	USA	0.950355	0.953948	0.913575	0.841952	0.937033	0.925365	0.945623	0.923594
Soaproot	USA_SITE_033	USA	0.885063	0.795436	0.807021	0.609058	0.862932	0.884494	0.884415
P301	USA_SITE_034	USA	0.83867	0.703959	0.813862	0.468074	0.7678	0.787763	0.808343	0.896609
Wind River	USA_SITE_035	USA	0.822815	0.821514	0.775732	0.864331	0.832031	0.871238	0.780958
Hauser Farm South	USA_SITE_037	USA	0.28871	0.167039	0.200722	0.361491	0.353655	0.154159	0.352014	0.338742
Metolius	USA_SITE_038	USA	0.833838	0.760704	0.384178	0.886315	0.879832	0.877838	0.90395	0.876965
Rosemount	USA_SITE_041	USA	0.526056	0.311687	0.263949	0.491096	0.372576	0.435513	0.504428	0.339871
Park Falls	USA_SITE_042	USA	0.760544	0.607358	0.571308	0.623219	0.576037	0.659398	0.632506
UMBS	USA_SITE_043	USA	0.854813	0.685818	0.645662		0.732019		0.830603	0.764796
Daniel Forest	USA_SITE_046	USA	0.807393	0.685057	0.693716	0.692901	0.808922	0.804342	0.821005	0.744591
Tenderfoot Creek	USA_SITE_047	USA	0.778076	0.668715	0.726161	0.742153	0.818306	0.802098	0.783181
Fort Peck	USA_SITE_048	USA	0.76913	0.758819	0.719422	0.679167	0.735641	0.73662	0.761749	0.716491
JERC	USA_SITE_052	USA	0.774117	0.596185	0.571332	0.701059	0.671464	0.820479	0.665154
Savannah River	USA_SITE_053	USA	0.834896	0.759961	0.59996	0.739781	0.658138	0.832204	0.631883
Freeman Ranch	USA_SITE_057	USA	0.850795	0.828005	0.845787	0.771664	0.790186	0.845554	0.825623	0.810314
Sevilleta New Grass	USA_SITE_058	USA	0.323231	0.625291	0.597321	0.523241	0.573636	0.625676	0.755618
Lucky Hills	USA_SITE_060	USA	0.269503	0.33682	0.437204	0.3064	0.3911	0.460519	0.48343
Flag Wildfire	USA_SITE_061	USA	0.787808	0.601518	0.652244	0.543975	0.635986	0.748111	0.808628	0.824249
Flag Ponderosa Pine	USA_SITE_062	USA	0.814742	0.541245	0.744415	0.59691	0.751244	0.828982	0.824747	0.754685
Beltsville	USA_SITE_065	USA	0.736626	0.795364	0.794923	0.57437	0.609962	0.513085	0.78502
Jornada Mixed Shrubland	USA_SITE_072	USA	0.644222	0.728576	0.736114	0.693118	0.609331	0.826973	0.865204
AliceHolt	ALIC1	UK	0.663962	0.84312	0.88805	0.738829	0.787403	0.87485	0.867908	0.819249
Balruddery	BALRD	UK	0.849896	0.632348	0.455147	0.735151	0.682686	0.573162	0.813907	0.57715
BickleyHall	BICKL	UK	0.880543	0.844977	0.671656	0.845834	0.78261	0.862357	0.764672	0.787838
BunnyPark	BUNNY	UK	0.923403	0.816156	0.635216	0.829536	0.789493	0.73864	0.853503	0.724445
Cardington	CARDT	UK	0.821588	0.874715	0.863331	0.793314	0.783263	0.863142	0.883694	0.841743
ChimneyMeadows	CHIMN	UK	0.740954	0.883844	0.812219	0.84287	0.84481	0.870169	0.855866	0.882023
ChobhamCommon	CHOBH	UK	0.752436	0.873126	0.821203	0.826503	0.805269	0.87799	0.89374	0.807189
Cochno	COCHN	UK	0.530582	0.788653	0.691056	0.548916	0.700991	0.742032	0.74655	0.57809
CocklePark	COCLP	UK	0.523045	0.772796	0.652342		0.807465		0.875748	0.819229
Crichton	CRICH	UK	0.703837	0.792537	0.636125	0.692612	0.664329	0.743147	0.673085	0.689636
CwmGarw	CGARW	UK	0.722916	0.799436	0.567876	0.638043	0.624799		0.595607	0.592193
EasterBush	EASTB	UK	0.789104	0.754276	0.494306	0.664987	0.718814	0.755146	0.74582	0.670995
Elmsett	ELMST	UK	0.90316	0.875728	0.704412		0.828939	0.830964	0.856072	0.827352
Euston	EUSTN	UK	0.902984	0.849355	0.651959	0.75771	0.764912	0.750696	0.793789	0.585943
Fincham	FINCH	UK	0.814443	0.777495	0.710632	0.687448	0.734573	0.729007	0.773529	0.640696
GisburnForest	GISBN	UK	0.655487	0.636486	0.520917	0.670869	0.601936	0.616737	0.572079	0.637758
Glensaugh	GLENS	UK	0.372374	0.25595	0.195386	0.298611	0.285037	0.117646	0.290097	0.170485
Glenwherry	GLENW	UK	0.593716		0.486156	0.0811946	0.586761	0.618094	0.57712	0.598239
Hadlow	HADLW	UK	0.912369	0.898532	0.852967	0.868966	0.885294	0.88946	0.863007	0.855007
HartwoodHome	HARTW	UK	0.72585	0.738013	0.538608	0.63575	0.715477	0.719304	0.700375	0.769618
HarwoodForest	HARWD	UK	0.636193	0.640486	0.371689	0.63328	0.55168	0.641994	0.640165	0.485401
HenfaesFarm	HENFS	UK	0.774118	0.691132	0.723062	0.7461	0.703016		0.774364	0.659809
Heytesbury	HYBRY	UK	0.667066	0.860636	0.691528	0.868155	0.817106	0.80089	0.795585	0.794674
Hillsborough	HILLB	UK	0.626935	0.779665	0.699782	0.721824	0.691453	0.787357	0.724476	0.694479
HollinHill	HOLLN	UK	0.810669	0.826707	0.736423	0.70703	0.758208	0.79854	0.831338	0.784165
Loddington	LODTN	UK	0.676627	0.857127	0.718416	0.825097	0.808556	0.786467	0.870104	0.73296
LullingtonHeath	LULLN	UK	0.819307	0.873844	0.632988	0.741784	0.841947		0.753848	0.796315
MoorHouse	MOORH	UK	0.493943	0.681909	0.597451	0.672711	0.611821	0.665606	0.608941	0.644994
Morley	MORLY	UK	0.795786	0.861773	0.630837	0.786711	0.785131		0.818333	0.721961
NorthWyke	NWYKE	UK	0.781777	0.829134	0.799261	0.738357	0.852162	0.863844	0.83393	0.854106
Plynlimon	PLYNL	UK	0.454143		0.391237		0.467979	0.576857	0.632941	0.430045
PortonDown	PORTN	UK	0.731249	0.860108	0.666172	0.849647	0.768404	0.798775	0.809421	0.761219
Redhill	REDHL	UK	0.794132	0.865801	0.646632	0.78452	0.799903	0.851857	0.731055	0.713087
Redmere	RDMER	UK	0.519478	0.516701	0.308773	0.435079	0.368702	0.271048	0.499579	0.346494
Riseholme	RISEH	UK	0.751208	0.81827	0.717209	0.849057	0.806594	0.78291	0.857643	0.780104
Rothamsted	ROTHD	UK	0.826072	0.784191	0.643817	0.773792	0.745323	0.786708	0.843847	0.762032
Sheepdrove	SHEEP	UK	0.837573	0.812591	0.708809	0.834946	0.757597	0.782957	0.814202	0.77974
Sourhope	SOURH	UK	0.65845	0.688931	0.668319	0.704919	0.717612	0.747821	0.678246	0.790084
SpenFarm	SPENF	UK	0.756164	0.808107	0.672263	0.800071	0.786633	0.822836	0.793156	0.784187
Stiperstones	STIPS	UK	0.772892	0.777583	0.611994	0.807882	0.70597	0.766449	0.761711	0.662244
Stoughton	STGHT	UK	0.872962	0.847498	0.643772	0.834934	0.821133	0.786706	0.853009	0.710595
TadhamMoor	TADHM	UK	0.447897	0.430908	0.409154	0.452256	0.396447	0.423017	0.509893	0.430125
TheLizard	LIZRD	UK	0.816754		0.713329		0.790044		0.872866	0.778866
Waddesdon	WADDN	UK	0.753156	0.861338	0.877815	0.812461	0.854084	0.855321	0.870743	0.88486
Writtle	WRTTL	UK	0.850511	0.889002	0.851255	0.780786	0.887351	0.845962	0.868872	0.849986
Aas	AAC001	Norway	0.75748	0.731481	0.368035	0.583474	0.713486	0.629552	0.546023	0.659146
Acheleschwaig	ACC001	Germany	0.726162	0.738603	0.597746	0.597629	0.556858	0.751767	0.620893	0.560395
Agia	AGCK003	Greece	0.809155	0.684454	0.703018	0.699869	0.6819	0.758898	0.747553	0.783156
Alento1	ALC001	Italy	0.927621		0.856996	0.89753	0.852735		0.835236	0.871107
Alento2	ALC002	Italy	0.912039		0.802972	0.878042	0.84891		0.792503	0.815468
Calderona1	CAC001	Spain	0.827484	0.836812	0.846305	0.598429	0.717415		0.771911	0.761085
Crolles	CRC001	France	0.66978	0.542503	0.432249	0.561119	0.605133	0.599059	0.582858	0.408157
Cunnersdorf	CUC001	Germany	0.829214	0.772416	0.789969	0.828753	0.791912	0.777311	0.888685	0.839084
Derlo	DEC001	Poland	0.862646	0.797647	0.736777	0.634886	0.785867	0.793989	0.842149	0.75776
Fendt	FEC001	Germany	0.696703	0.707151	0.740003	0.627537	0.758512	0.717705	0.668483	0.733052
Fuerstensee	FSC001	Germany	0.885672	0.79553	0.665106	0.79984	0.784868	0.806085	0.894095	0.776529
Grosses Bruch	GBC001	Germany	0.800556	0.825615	0.717137	0.751316	0.733171	0.751149	0.844518	0.82924
Gludsted	GLC001	Denmark	0.815078	0.82907	0.516029	0.798118	0.764589	0.769997	0.839276	0.76637
Harrild	HAC001	Denmark	0.653214	0.65123	0.294209	0.66011	0.620777	0.570998	0.726673	0.643597
Hordorf	HDC001	Germany	0.68708	0.701925	0.548467	0.590198	0.66082	0.621342	0.681204	0.767235
Serrahn	HHC001	Germany	0.880211	0.843848	0.797436	0.810158	0.845093	0.883917	0.887836	0.769517
Hohes Holz	HOC001	Germany	0.735374	0.726721	0.767728	0.790534	0.755839	0.81239	0.814319	0.861584
Jena	JEC001	Germany	0.832357	0.817068	0.655813	0.612589	0.744491	0.668373	0.837732	0.762518
Merzenhausen	MEBCK001	Germany	0.912706	0.818835	0.656088	0.822393	0.780574	0.749864	0.842073	0.765562
Olocau	OLC001	Spain	0.787101	0.787428	0.783204	0.525953	0.675858	0.788192	0.758285	0.737837
Petzenkirchen	PEC001	Austria	0.822355	0.684017	0.519012	0.583424	0.710981	0.722281	0.532934	0.741708
Rietholzbach	RIC001	Switzerland	0.764737	0.706897	0.572354	0.612524	0.664657	0.690762	0.745154	0.742049
Rollesbroich1	ROC001	Germany	0.79226	0.657516	0.565267	0.704056	0.73779	0.72581	0.704733	0.687029
Rollesbroich2	ROC002	Germany	0.773353	0.705882	0.640241	0.724573	0.766128	0.747298	0.735471	0.768428
Schoeneseiffen	RUBCDKR001	Germany	0.898703	0.794236	0.696134	0.836247	0.834946	0.779299	0.791639	0.76401
Gevenich	RUBCK002	Germany	0.894607	0.792497	0.626831	0.785675	0.775072	0.699125	0.773421	0.73818
Ruraue	RUBCK003	Germany	0.859118	0.850681	0.743266	0.841628	0.798474	0.810506	0.867998	0.829098
Wildenrath	RUBCK004	Germany	0.88697	0.867712	0.743178	0.823272	0.827806	0.838892	0.843562	0.870443
Heinsberg	RUC004	Germany	0.872656	0.830286	0.708203	0.824381	0.810458	0.796295	0.865359	0.830091
Kall	RUC005	Germany	0.829061	0.682727	0.57407	0.747696	0.748286	0.679141	0.820078	0.707279
Aachen	RUC006	Germany	0.869183	0.782022	0.620697	0.774863	0.773537	0.745994	0.844105	0.734726
Kleinhau1	RUC007	Germany	0.907982	0.809215	0.711866	0.860358	0.828285	0.784921	0.831482	0.77869
Saerheim	SAC001	Norway			0.608627		0.707452		0.73788	0.841002
Schaefertal1	SCC001	Germany	0.837506	0.69447	0.620607	0.644104	0.742583	0.599212	0.810185	0.816148
Schaefertal4	SCC004	Germany	0.821346	0.643454	0.646356	0.573296	0.717237	0.571881	0.715024	0.870514
Selhausen	SEC001	Germany	0.807885	0.727405	0.589973	0.723343	0.70933	0.667878	0.734761	0.672851
Toulouse	TOC001	France	0.916747	0.854566	0.824292	0.793952	0.832416	0.829637	0.868089
Voulund	VOC001	Denmark	0.798888	0.786612	0.287893	0.778885	0.755891	0.673598	0.735545	0.701854
Wildacker	WAC001	Germany	0.843778	0.885171	0.849536	0.734057	0.871837	0.854222	0.877259	0.789479
Wuestebach1	WUC001	Germany	0.671741	0.506239	0.464219	0.602811	0.617849	0.638749	0.589454	0.511354
Wuestebach2	WUC002	Germany	0.616553	0.463495	0.47552	0.496154	0.60097	0.551406	0.57502	0.533083
Baldry	AUS_SITE_001	Australia	0.928333	0.829418	0.868038	0.631491	0.76478	0.83138	0.863778
Daly	AUS_SITE_002	Australia	0.714095	0.732461	0.618762	0.709661	0.712399	0.690962	0.716251	0.7636
Gnangara	AUS_SITE_003	Australia	0.831076		0.862458	0.782309	0.706438	0.828131	0.833292	0.845224
Robson	AUS_SITE_006	Australia	0.761497	0.717486	0.68901	0.726233	0.724413		0.784838	0.650359
Temora	AUS_SITE_007	Australia	0.79998	0.788124	0.829297	0.670974	0.839537	0.816126	0.826224	0.895638
Tullochgorum	AUS_SITE_008	Australia	0.745788	0.635299	0.889225	0.514352	0.725699	0.792482	0.737603	0.878955
Tumbarumba	AUS_SITE_009	Australia	0.78826	0.761077	0.695887	0.607543	0.662494	0.744432	0.652861	0.624712
Weany Creek	AUS_SITE_010	Australia	0.782734	0.772752	0.707389	0.701051	0.739807	0.737299	0.813753	0.855219
Yanco	AUS_SITE_011	Australia	0.720092	0.678775	0.63331	0.631686	0.617184	0.70173	0.672073	0.844191
Hamilton	AUS_SITE_015	Australia	0.861793	0.785338	0.881281	0.673119	0.755052	0.794172	0.908296	0.846652
Bishes	AUS_SITE_018	Australia	0.848211	0.808989	0.662978	0.794985	0.76818	0.700618	0.80943	0.915238

## Sheet: 2Rsea
CRNS site name	Station ID	Country	ERA5-Land	CFSv2	MERRA2	JRA55	GLDAS	CRA40	GLEAM	SMAPL4
Manitou Forest Tower	USA_SITE_004	USA	0.614953	0.493076	0.777117	0.602036	0.443638	0.674563	0.739501	0.760428
Marshall Colorado	USA_SITE_006	USA	0.852404	0.709069	0.900653	0.739226	0.834179	0.880981	0.837319	0.879488
Kendall	USA_SITE_010	USA	0.765586	0.663914	0.681175	0.558958	0.767728	0.798246	0.771739	0.724445
Santa Rita Creosote	USA_SITE_011	USA	0.740018	0.760576	0.758626	0.443179	0.744065	0.833701	0.880034	0.88437
SMAP-OK	USA_SITE_014	USA	0.846099	0.778699	0.844624	0.706312	0.810958	0.789034	0.794445	0.86851
ARM-1	USA_SITE_015	USA	0.751443	0.680556	0.765243	0.595373	0.735382	0.672277	0.587723	0.644354
Iowa Validation Site	USA_SITE_016	USA	0.52576	0.358966	0.469024	0.496595	0.51764	0.494891	0.622153	0.285043
San Pedro 2	USA_SITE_020	USA	0.66886	0.873232	0.768175	0.714307	0.872605	0.77651	0.90301
Desert Chaparral UCI	USA_SITE_023	USA	0.843054	0.848122	0.807311	0.805992	0.774334	0.798966	0.896063	0.834967
Coastal Sage UCI	USA_SITE_024	USA	0.922023	0.909866	0.824382	0.852284	0.902631	0.943314	0.905891	0.926788
Chestnut Ridge NOAA	USA_SITE_025	USA	0.683164	0.80818	0.776233	0.817542	0.848991	0.856867	0.791118
Bondville	USA_SITE_026	USA	0.730107	0.644019	0.613796	0.689186	0.534855	0.664083	0.762299	0.666039
Morgan Monroe	USA_SITE_027	USA	0.843154	0.873776	0.758213	0.888495	0.71632	0.772686	0.862364
Mozark	USA_SITE_028	USA	0.798693	0.802276	0.863128	0.718094	0.819956	0.869479	0.799571	0.856128
Neb Field 3	USA_SITE_029	USA	0.697791	0.505186	0.559876	0.677351	0.576095	0.674459	0.675857	0.602341
Harvard Forest	USA_SITE_030	USA	0.795133	0.788466	0.817693	0.899048	0.741376	0.78188	0.863326	0.862379
Howland	USA_SITE_031	USA	0.785845	0.752118	0.80378	0.82998	0.900208	0.594051	0.935398	0.821853
Tonzi Ranch	USA_SITE_032	USA	0.966593	0.967814	0.929342	0.878783	0.962156	0.936241	0.961535	0.931412
Soaproot	USA_SITE_033	USA	0.908373	0.830294	0.821857	0.647709	0.887605	0.899584	0.90051
P301	USA_SITE_034	USA	0.84533	0.739088	0.804413	0.514142	0.772392	0.755947	0.808101	0.887921
Wind River	USA_SITE_035	USA	0.880161	0.882689	0.850433	0.934003	0.930031	0.928185	0.853226
Hauser Farm South	USA_SITE_037	USA	0.276291	0.145834	0.209716	0.339631	0.416579	0.137057	0.387146	0.387406
Metolius	USA_SITE_038	USA	0.87354	0.816135	0.33937	0.937113	0.931503	0.903517	0.92494	0.909105
Rosemount	USA_SITE_041	USA	0.460722	0.216439	0.167189	0.388229	0.2745	0.314654	0.454151	0.0454369
Park Falls	USA_SITE_042	USA	0.81044	0.610444	0.596233	0.745362	0.654668	0.599969	0.67464
UMBS	USA_SITE_043	USA	0.903718	0.732673	0.643463		0.849261		0.868764	0.84771
Daniel Forest	USA_SITE_046	USA	0.895537	0.775023	0.731128	0.767985	0.893081	0.897751	0.862761	0.818175
Tenderfoot Creek	USA_SITE_047	USA	0.889187	0.771405	0.842144	0.794169	0.928484	0.888868	0.87031
Fort Peck	USA_SITE_048	USA	0.80465	0.784145	0.790087	0.759109	0.813501	0.748097	0.797089	0.771839
JERC	USA_SITE_052	USA	0.813559	0.585623	0.630314	0.724323	0.747235	0.820324	0.662677
Savannah River	USA_SITE_053	USA	0.866049	0.786862	0.637654	0.775543	0.77891	0.811401	0.608301
Freeman Ranch	USA_SITE_057	USA	0.904284	0.873186	0.9105	0.812338	0.863104	0.868217	0.878528	0.840222
Sevilleta New Grass	USA_SITE_058	USA	0.259001	0.689612	0.622116	0.55033	0.583993	0.569426	0.774514
Lucky Hills	USA_SITE_060	USA	0.238355	0.310013	0.432958	0.302055	0.389378	0.413535	0.443873
Flag Wildfire	USA_SITE_061	USA	0.795477	0.594008	0.62724	0.640342	0.652345	0.691563	0.821216	0.877678
Flag Ponderosa Pine	USA_SITE_062	USA	0.837193	0.537344	0.792931	0.698057	0.813718	0.845488	0.85907	0.81462
Beltsville	USA_SITE_065	USA	0.782672	0.838104	0.823402	0.612672	0.732625	0.590876	0.81611
Jornada Mixed Shrubland	USA_SITE_072	USA	0.641794	0.785533	0.791486	0.739965	0.657419	0.827637	0.892343
AliceHolt	ALIC1	UK	0.698147	0.894916	0.928909	0.776148	0.858658	0.922341	0.935963	0.881678
Balruddery	BALRD	UK	0.902432	0.635138	0.479925	0.788204	0.777828	0.582389	0.889316	0.585246
BickleyHall	BICKL	UK	0.9116	0.862064	0.68418	0.870909	0.827128	0.87992	0.812148	0.809869
BunnyPark	BUNNY	UK	0.94182	0.830637	0.639889	0.863684	0.862743	0.735136	0.882935	0.728969
Cardington	CARDT	UK	0.855335	0.909392	0.876874	0.810316	0.812146	0.872913	0.903702	0.854477
ChimneyMeadows	CHIMN	UK	0.810347	0.934675	0.865147	0.887442	0.906188	0.902261	0.899977	0.91572
ChobhamCommon	CHOBH	UK	0.791555	0.912523	0.850283	0.861965	0.889007	0.9074	0.949458	0.839947
Cochno	COCHN	UK	0.667554	0.881979	0.751854	0.665924	0.838259	0.806994	0.888889	0.629503
CocklePark	COCLP	UK	0.670484	0.786017	0.652926		0.885888		0.913916	0.836583
Crichton	CRICH	UK	0.776046	0.82689	0.685138	0.74222	0.716125	0.777635	0.790038	0.723075
CwmGarw	CGARW	UK	0.79508	0.842677	0.619694	0.710452	0.666837		0.622872	0.629718
EasterBush	EASTB	UK	0.849687	0.813783	0.516751	0.691282	0.815429	0.803473	0.773957	0.701131
Elmsett	ELMST	UK	0.930602	0.933354	0.724056		0.873297	0.84127	0.903512	0.869415
Euston	EUSTN	UK	0.934518	0.883366	0.644365	0.772603	0.806641	0.751045	0.827096	0.571507
Fincham	FINCH	UK	0.824859	0.796752	0.716815	0.6836	0.767163	0.724401	0.808428	0.633649
GisburnForest	GISBN	UK	0.750919	0.711644	0.590071	0.758268	0.695882	0.693587	0.680032	0.710866
Glensaugh	GLENS	UK	0.450068	0.279558	0.220206	0.335611	0.368006	0.100852	0.322329	0.162385
Glenwherry	GLENW	UK	0.682092		0.542783	-0.00843475	0.675882	0.706257	0.700325	0.673029
Hadlow	HADLW	UK	0.937859	0.931105	0.880907	0.929276	0.927024	0.90414	0.921105	0.923116
HartwoodHome	HARTW	UK	0.837387	0.802913	0.592871	0.713935	0.819008	0.782193	0.830811	0.851285
HarwoodForest	HARWD	UK	0.786073	0.783291	0.462004	0.800953	0.753397	0.80542	0.809683	0.602413
HenfaesFarm	HENFS	UK	0.834106	0.76959	0.762473	0.791016	0.762084		0.849923	0.674556
Heytesbury	HYBRY	UK	0.76268	0.887635	0.728673	0.894566	0.876583	0.813373	0.828797	0.836064
Hillsborough	HILLB	UK	0.713751	0.826818	0.738201	0.778058	0.758532	0.818844	0.812436	0.731966
HollinHill	HOLLN	UK	0.856949	0.87522	0.761336	0.762695	0.818932	0.837724	0.894484	0.81994
Loddington	LODTN	UK	0.723489	0.907511	0.732376	0.87419	0.865519	0.799026	0.910907	0.757768
LullingtonHeath	LULLN	UK	0.874037	0.898369	0.635067	0.755861	0.879296		0.769676	0.820179
MoorHouse	MOORH	UK	0.566296	0.778118	0.647293	0.719672	0.679489	0.716285	0.746248	0.688769
Morley	MORLY	UK	0.842128	0.903886	0.626389	0.803814	0.844994		0.862845	0.708929
NorthWyke	NWYKE	UK	0.853057	0.901457	0.833189	0.787715	0.893926	0.900371	0.912397	0.889559
Plynlimon	PLYNL	UK	0.525635		0.453565		0.52159	0.624282	0.707733	0.473738
PortonDown	PORTN	UK	0.803464	0.876609	0.695642	0.875579	0.812474	0.797992	0.845791	0.780129
Redhill	REDHL	UK	0.811362	0.890586	0.626608	0.814371	0.835828	0.861463	0.741868	0.72799
Redmere	RDMER	UK	0.69622	0.705318	0.328394	0.553633	0.470375	0.28389	0.666935	0.455995
Riseholme	RISEH	UK	0.784908	0.830492	0.736729	0.86562	0.85433	0.773765	0.864677	0.823218
Rothamsted	ROTHD	UK	0.868299	0.804317	0.648279	0.786652	0.784916	0.788032	0.873429	0.762617
Sheepdrove	SHEEP	UK	0.882256	0.854687	0.755224	0.881596	0.81029	0.80653	0.847875	0.804798
Sourhope	SOURH	UK	0.746573	0.730576	0.704095	0.759274	0.804541	0.799798	0.792586	0.817206
SpenFarm	SPENF	UK	0.818372	0.829369	0.681598	0.829858	0.850837	0.838952	0.841085	0.808183
Stiperstones	STIPS	UK	0.840373	0.834559	0.680085	0.867979	0.781426	0.814892	0.845976	0.700724
Stoughton	STGHT	UK	0.910567	0.886059	0.641033	0.863213	0.896444	0.800575	0.893004	0.720214
TadhamMoor	TADHM	UK	0.626758	0.590989	0.557408	0.648475	0.538157	0.577049	0.735463	0.563756
TheLizard	LIZRD	UK	0.876192		0.765878		0.843207		0.925433	0.813667
Waddesdon	WADDN	UK	0.789487	0.918954	0.916303	0.851273	0.908449	0.889316	0.903841	0.913173
Writtle	WRTTL	UK	0.87554	0.921609	0.872286	0.826276	0.942135	0.854258	0.892306	0.876177
Aas	AAC001	Norway	0.793953	0.7691	0.403827	0.61504	0.794981	0.66833	0.593605	0.697274
Acheleschwaig	ACC001	Germany	0.700053	0.856572	0.670065	0.546699	0.628956	0.798801	0.810171	0.551165
Agia	AGCK003	Greece	0.853529	0.713087	0.748579	0.731999	0.750147	0.795422	0.811442	0.824786
Alento1	ALC001	Italy	0.956216		0.907911	0.940943	0.924981		0.870305	0.911165
Alento2	ALC002	Italy	0.939469		0.84873	0.923129	0.914469		0.819446	0.850881
Calderona1	CAC001	Spain	0.83359	0.853327	0.875952	0.666391	0.770253		0.793114	0.772181
Crolles	CRC001	France	0.752377	0.599071	0.546299	0.646348	0.744309	0.655718	0.687402	0.469968
Cunnersdorf	CUC001	Germany	0.858384	0.804841	0.815997	0.890898	0.845308	0.801008	0.923765	0.879117
Derlo	DEC001	Poland	0.903607	0.827726	0.761426	0.645595	0.825573	0.812746	0.875357	0.754142
Fendt	FEC001	Germany	0.720249	0.729446	0.788529	0.606504	0.848624	0.812465	0.782619	0.767934
Fuerstensee	FSC001	Germany	0.897734	0.810289	0.65798	0.824012	0.817095	0.813876	0.925106	0.787717
Grosses Bruch	GBC001	Germany	0.842234	0.880053	0.736892	0.799518	0.780421	0.778293	0.887942	0.858637
Gludsted	GLC001	Denmark	0.862209	0.874444	0.522449	0.839855	0.834276	0.782308	0.877959	0.777628
Harrild	HAC001	Denmark	0.661703	0.654426	0.29426	0.671481	0.637159	0.550338	0.747957	0.64152
Hordorf	HDC001	Germany	0.704276	0.724618	0.569272	0.620427	0.718956	0.645955	0.707902	0.785765
Serrahn	HHC001	Germany	0.902093	0.86507	0.807365	0.840268	0.882331	0.912559	0.919936	0.854643
Hohes Holz	HOC001	Germany	0.76415	0.759782	0.782038	0.849669	0.795944	0.839998	0.848188	0.906938
Jena	JEC001	Germany	0.849933	0.842181	0.674792	0.577846	0.804347	0.674178	0.902405	0.778819
Merzenhausen	MEBCK001	Germany	0.939784	0.833187	0.658354	0.850668	0.828169	0.755101	0.886182	0.776482
Olocau	OLC001	Spain	0.809431	0.809229	0.815532	0.515759	0.745732	0.814888	0.794695	0.771538
Petzenkirchen	PEC001	Austria	0.893119	0.728129	0.544823	0.617529	0.797086	0.790606	0.509719	0.759505
Rietholzbach	RIC001	Switzerland	0.810096	0.765948	0.614286	0.657742	0.814633	0.808653	0.882273	0.824401
Rollesbroich1	ROC001	Germany	0.819439	0.66515	0.587402	0.723546	0.790413	0.747238	0.742298	0.705549
Rollesbroich2	ROC002	Germany	0.806017	0.728461	0.655522	0.753658	0.820709	0.767068	0.778988	0.782948
Schoeneseiffen	RUBCDKR001	Germany	0.931892	0.818341	0.735136	0.867915	0.896747	0.802929	0.832534	0.795783
Gevenich	RUBCK002	Germany	0.918677	0.799423	0.617861	0.803137	0.817356	0.693526	0.807989	0.745466
Ruraue	RUBCK003	Germany	0.88397	0.872608	0.75142	0.867674	0.847674	0.831821	0.926775	0.845007
Wildenrath	RUBCK004	Germany	0.901426	0.888434	0.752414	0.842808	0.877145	0.845133	0.873827	0.895214
Heinsberg	RUC004	Germany	0.896677	0.848062	0.714718	0.850588	0.868601	0.801607	0.911885	0.847327
Kall	RUC005	Germany	0.857104	0.695977	0.592886	0.771427	0.785574	0.681835	0.852699	0.729239
Aachen	RUC006	Germany	0.90637	0.811134	0.627173	0.816847	0.841464	0.757213	0.903964	0.757767
Kleinhau1	RUC007	Germany	0.939897	0.839699	0.742673	0.890247	0.888152	0.80338	0.87555	0.794736
Saerheim	SAC001	Norway			0.661942		0.785489		0.789918	0.889916
Schaefertal1	SCC001	Germany	0.89773	0.716455	0.639702	0.690405	0.79988	0.593497	0.860213	0.824159
Schaefertal4	SCC004	Germany	0.894114	0.704462	0.686037	0.634138	0.814341	0.60055	0.778818	0.890763
Selhausen	SEC001	Germany	0.798037	0.703063	0.548568	0.708139	0.728418	0.620551	0.701768	0.628996
Toulouse	TOC001	France	0.947319	0.899475	0.877711	0.819022	0.887292	0.8638	0.892618
Voulund	VOC001	Denmark	0.839745	0.815281	0.28473	0.833628	0.823287	0.6728	0.787569	0.670097
Wildacker	WAC001	Germany	0.861742	0.906885	0.866187	0.752126	0.906791	0.872354	0.910762	0.866672
Wuestebach1	WUC001	Germany	0.719524	0.519639	0.501458	0.641998	0.699848	0.678419	0.631703	0.549666
Wuestebach2	WUC002	Germany	0.64706	0.486309	0.508405	0.508837	0.646572	0.573972	0.590926	0.579094
Baldry	AUS_SITE_001	Australia	0.954716	0.851715	0.89692	0.644772	0.805043	0.819838	0.872172
Daly	AUS_SITE_002	Australia	0.758819	0.791504	0.680131	0.800649	0.772702	0.740946	0.766988	0.816085
Gnangara	AUS_SITE_003	Australia	0.907453		0.915636	0.86151	0.850197	0.86795	0.881419	0.914464
Robson	AUS_SITE_006	Australia	0.804057	0.75127	0.701397	0.771757	0.795079		0.855255	0.645607
Temora	AUS_SITE_007	Australia	0.758898	0.761267	0.835946	0.631871	0.891685	0.811738	0.808141	0.90314
Tullochgorum	AUS_SITE_008	Australia	0.762377	0.685351	0.909325	0.549958	0.780061	0.82495	0.758093	0.907181
Tumbarumba	AUS_SITE_009	Australia	0.831264	0.795804	0.718068	0.626671	0.730746	0.804083	0.6749	0.636402
Weany Creek	AUS_SITE_010	Australia	0.752281	0.775647	0.764663	0.68351	0.771584	0.757157	0.824967	0.864891
Yanco	AUS_SITE_011	Australia	0.690928	0.670689	0.612797	0.647683	0.633174	0.692433	0.646205	0.84831
Hamilton	AUS_SITE_015	Australia	0.867923	0.835976	0.887034	0.798033	0.790421	0.814105	0.920539	0.87262
Bishes	AUS_SITE_018	Australia	0.843818	0.815553	0.663083	0.822217	0.827104	0.659126	0.803035	0.917139

## Sheet: 3Rano
CRNS site name	Station ID	Country	ERA5-Land	CFSv2	MERRA2	JRA55	GLDAS	CRA40	GLEAM	SMAPL4
Manitou Forest Tower	USA_SITE_004	USA	0.69238	0.614632	0.673778	0.541661	0.413724	0.749161	0.730637	0.662641
Marshall Colorado	USA_SITE_006	USA	0.719867	0.547586	0.739002	0.542071	0.302417	0.76958	0.750349	0.789667
Kendall	USA_SITE_010	USA	0.44061	0.493755	0.599876	0.430624	0.461858	0.613559	0.707087	0.640789
Santa Rita Creosote	USA_SITE_011	USA	0.701937	0.61435	0.65543	0.484215	0.52809	0.722474	0.821805	0.810988
SMAP-OK	USA_SITE_014	USA	0.743239	0.670883	0.736194	0.615592	0.516384	0.765769	0.8004	0.84193
ARM-1	USA_SITE_015	USA	0.764697	0.71223	0.767251	0.642599	0.592332	0.794905	0.839047	0.848989
Iowa Validation Site	USA_SITE_016	USA	0.656116	0.584724	0.650614	0.592354	0.451535	0.68077	0.630275	0.641578
San Pedro 2	USA_SITE_020	USA	0.289158	0.576273	0.538273	0.428275	0.446821	0.511797	0.634449
Desert Chaparral UCI	USA_SITE_023	USA	0.712627	0.746843	0.654876	0.503727	0.33631	0.765823	0.742675	0.774687
Coastal Sage UCI	USA_SITE_024	USA	0.841956	0.795159	0.688292	0.687846	0.368861	0.740589	0.779769	0.822041
Chestnut Ridge NOAA	USA_SITE_025	USA	0.52991	0.548596	0.568376	0.489563	0.419027	0.467197	0.526923
Bondville	USA_SITE_026	USA	0.583491	0.581845	0.569623	0.555018	0.402636	0.559733	0.625755	0.746968
Morgan Monroe	USA_SITE_027	USA	0.539442	0.551301	0.564359	0.454365	0.336382	0.414518	0.55131
Mozark	USA_SITE_028	USA	0.632621	0.615068	0.698325	0.652229	0.555312	0.684079	0.654251	0.719258
Neb Field 3	USA_SITE_029	USA	0.636784	0.613486	0.664237	0.518828	0.474318	0.732575	0.663351	0.740679
Harvard Forest	USA_SITE_030	USA	0.663122	0.565532	0.663878	0.532647	0.403563	0.582391	0.526482	0.718173
Howland	USA_SITE_031	USA	0.695911	0.590438	0.643861	0.633432	0.454089	0.545257	0.491338	0.684862
Tonzi Ranch	USA_SITE_032	USA	0.847669	0.796626	0.760676	0.564779	0.591661	0.764693	0.732545	0.837392
Soaproot	USA_SITE_033	USA	0.807136	0.747413	0.719753	0.603083	0.709072	0.812	0.751892
P301	USA_SITE_034	USA	0.814215	0.676927	0.839162	0.448534	0.677834	0.813671	0.74003	0.810472
Wind River	USA_SITE_035	USA	0.576328	0.6081	0.453172	0.56322	0.354682	0.569839	0.475285
Hauser Farm South	USA_SITE_037	USA	0.323518	0.233341	0.277937	0.280889	0.237764	0.270061	0.355937	0.167616
Metolius	USA_SITE_038	USA	0.703588	0.61232	0.67878	0.588067	0.622715	0.754961	0.763225	0.699276
Rosemount	USA_SITE_041	USA	0.673989	0.606551	0.664975	0.633811	0.546091	0.686364	0.69223	0.736888
Park Falls	USA_SITE_042	USA	0.73299	0.639083	0.697932	0.51056	0.491753	0.720033	0.607917
UMBS	USA_SITE_043	USA	0.734972	0.637076	0.657006		0.458173		0.727722	0.670028
Daniel Forest	USA_SITE_046	USA	0.614425	0.502681	0.723518	0.5705	0.61778	0.672807	0.777025	0.526795
Tenderfoot Creek	USA_SITE_047	USA	0.484467	0.362923	0.473737	0.568366	0.504628	0.579455	0.559818
Fort Peck	USA_SITE_048	USA	0.664773	0.695941	0.568846	0.516196	0.541437	0.725986	0.663666	0.728334
JERC	USA_SITE_052	USA	0.766498	0.681966	0.702691	0.723866	0.629679	0.76258	0.768084
Savannah River	USA_SITE_053	USA	0.797637	0.775017	0.721819	0.691183	0.514286	0.771266	0.744843
Freeman Ranch	USA_SITE_057	USA	0.757046	0.737915	0.685984	0.677204	0.663519	0.754101	0.721701	0.775292
Sevilleta New Grass	USA_SITE_058	USA	0.393754	0.541837	0.559741	0.510667	0.508935	0.665392	0.749989
Lucky Hills	USA_SITE_060	USA	0.337552	0.464703	0.570723	0.345373	0.406166	0.487945	0.579751
Flag Wildfire	USA_SITE_061	USA	0.728189	0.589503	0.651858	0.44493	0.50812	0.731506	0.734821	0.714244
Flag Ponderosa Pine	USA_SITE_062	USA	0.743044	0.533046	0.602897	0.509115	0.521596	0.729554	0.715978	0.627577
Beltsville	USA_SITE_065	USA	0.610893	0.617642	0.643788	0.611332	0.415792	0.497628	0.6026
Jornada Mixed Shrubland	USA_SITE_072	USA	0.682044	0.62048	0.643899	0.637878	0.520645	0.764413	0.821465
AliceHolt	ALIC1	UK	0.451673	0.396139	0.421036	0.396236	0.235902	0.447736	0.332107	0.354485
Balruddery	BALRD	UK	0.709711	0.647859	0.61332	0.600618	0.389143	0.591642	0.656611	0.660595
BickleyHall	BICKL	UK	0.731096	0.695799	0.622907	0.690131	0.451612	0.717806	0.500701	0.649224
BunnyPark	BUNNY	UK	0.84704	0.744055	0.711207	0.696553	0.49392	0.818586	0.742565	0.715002
Cardington	CARDT	UK	0.714895	0.610967	0.636862	0.59559	0.441805	0.74054	0.670316	0.644207
ChimneyMeadows	CHIMN	UK	0.477883	0.577274	0.559072	0.548064	0.409045	0.61053	0.5786	0.669897
ChobhamCommon	CHOBH	UK	0.541227	0.543947	0.553429	0.517867	0.312418	0.593999	0.433277	0.507562
Cochno	COCHN	UK	0.0164223	0.486483	0.495014	0.409299	0.36445	0.435154	0.403753	0.500696
CocklePark	COCLP	UK	0.219411	0.636914	0.592101		0.263626		0.560245	0.596342
Crichton	CRICH	UK	0.480923	0.608892	0.60434	0.551976	0.438091	0.596695	0.409777	0.613158
CwmGarw	CGARW	UK	0.525222	0.643723	0.538748	0.537863	0.499018		0.544264	0.554972
EasterBush	EASTB	UK	0.608229	0.554761	0.569955	0.524285	0.348084	0.542129	0.62572	0.548538
Elmsett	ELMST	UK	0.743688	0.649776	0.600711		0.531048	0.73877	0.567779	0.667911
Euston	EUSTN	UK	0.794332	0.734083	0.711773	0.708964	0.494658	0.810693	0.590069	0.691495
Fincham	FINCH	UK	0.718002	0.643387	0.660942	0.62427	0.533263	0.765917	0.578566	0.702594
GisburnForest	GISBN	UK	0.333219	0.319789	0.330656	0.318399	0.235583	0.3263	0.318535	0.320997
Glensaugh	GLENS	UK	0.309082	0.238813	0.29602	0.270541	0.188476	0.271285	0.242935	0.334516
Glenwherry	GLENW	UK	0.35974		0.361126	0.224927	0.31662	0.317737	0.245231	0.31228
Hadlow	HADLW	UK	0.717527	0.65239	0.656595	0.50701	0.508038	0.707298	0.439909	0.509345
HartwoodHome	HARTW	UK	0.493427	0.528658	0.499565	0.462391	0.371081	0.50461	0.431632	0.438189
HarwoodForest	HARWD	UK	0.365956	0.378488	0.366758	0.333364	0.0812418	0.318783	0.313021	0.324544
HenfaesFarm	HENFS	UK	0.625017	0.586277	0.554861	0.563348	0.409037		0.522737	0.540966
Heytesbury	HYBRY	UK	0.411663	0.673563	0.599173	0.586882	0.37361	0.685391	0.497273	0.66245
Hillsborough	HILLB	UK	0.305154	0.573141	0.55199	0.55361	0.395094	0.614379	0.415558	0.516927
HollinHill	HOLLN	UK	0.61036	0.575146	0.495671	0.532021	0.342189	0.581753	0.429606	0.541823
Loddington	LODTN	UK	0.389257	0.50767	0.503639	0.509187	0.376891	0.602036	0.533955	0.530322
LullingtonHeath	LULLN	UK	0.54209	0.671682	0.634364	0.501822	0.515242		0.553746	0.609262
MoorHouse	MOORH	UK	0.197953	0.45773	0.497916	0.481582	0.343925	0.478054	0.403586	0.504211
Morley	MORLY	UK	0.618596	0.705164	0.637095	0.714206	0.448536		0.594915	0.719237
NorthWyke	NWYKE	UK	0.474098	0.605167	0.6236	0.627409	0.48874	0.644501	0.4624	0.53445
Plynlimon	PLYNL	UK	0.280703		0.382945		0.327867	0.463356	0.449413	0.429192
PortonDown	PORTN	UK	0.568315	0.757631	0.669984	0.703184	0.514358	0.824175	0.624946	0.738565
Redhill	REDHL	UK	0.673463	0.664272	0.651908	0.524218	0.513926	0.739282	0.531686	0.547627
Redmere	RDMER	UK	0.263251	0.227139	0.252108	0.247	0.154508	0.266622	0.241926	0.168772
Riseholme	RISEH	UK	0.465477	0.623354	0.567613	0.577188	0.372892	0.692956	0.654361	0.610902
Rothamsted	ROTHD	UK	0.603299	0.67289	0.678452	0.659625	0.496309	0.782912	0.686136	0.736882
Sheepdrove	SHEEP	UK	0.634871	0.586031	0.569218	0.571082	0.446957	0.619183	0.61261	0.670454
Sourhope	SOURH	UK	0.244046	0.430851	0.458007	0.436644	0.257226	0.424378	0.286277	0.477507
SpenFarm	SPENF	UK	0.577771	0.689919	0.651426	0.657972	0.445356	0.740626	0.552314	0.702061
Stiperstones	STIPS	UK	0.511703	0.553577	0.569005	0.560547	0.352873	0.561916	0.424658	0.551775
Stoughton	STGHT	UK	0.720402	0.628145	0.638288	0.679608	0.454856	0.732452	0.66526	0.662058
TadhamMoor	TADHM	UK	0.130246	0.139492	0.138204	0.128278	0.113759	0.132895	0.0909761	0.142912
TheLizard	LIZRD	UK	0.536878		0.56009		0.472292		0.617644	0.581518
Waddesdon	WADDN	UK	0.55985	0.465791	0.4834	0.503893	0.367445	0.510582	0.516225	0.53373
Writtle	WRTTL	UK	0.692312	0.599057	0.555779	0.442325	0.403961	0.68496	0.550104	0.495882
Aas	AAC001	Norway	0.759496	0.719709	0.521804	0.605346	0.520584	0.672704	0.567116	0.62156
Acheleschwaig	ACC001	Germany	0.800094	0.688685	0.626866	0.687533	0.46767	0.729354	0.557783	0.619647
Agia	AGCK003	Greece	0.706547	0.623103	0.597016	0.62525	0.514655	0.687464	0.617841	0.62236
Alento1	ALC001	Italy	0.728875		0.45553	0.618756	0.347028		0.546256	0.566316
Alento2	ALC002	Italy	0.774306		0.622488	0.642405	0.510761		0.651485	0.716236
Calderona1	CAC001	Spain	0.821923	0.778203	0.720072	0.587581	0.539746		0.678375	0.676432
Crolles	CRC001	France	0.670097	0.551926	0.376825	0.548486	0.42273	0.612281	0.459311	0.46603
Cunnersdorf	CUC001	Germany	0.622825	0.558589	0.589353	0.526582	0.339869	0.646131	0.626491	0.690852
Derlo	DEC001	Poland	0.790791	0.726463	0.698213	0.60965	0.680263	0.751009	0.763539	0.769994
Fendt	FEC001	Germany	0.703247	0.641228	0.640917	0.677685	0.55055	0.56314	0.5287	0.620594
Fuerstensee	FSC001	Germany	0.812628	0.724169	0.753237	0.673779	0.586081	0.799836	0.726171	0.740409
Grosses Bruch	GBC001	Germany	0.597841	0.530932	0.553384	0.422754	0.376459	0.571295	0.545422	0.611404
Gludsted	GLC001	Denmark	0.695058	0.676016	0.58021	0.665914	0.487308	0.677664	0.655925	0.686832
Harrild	HAC001	Denmark	0.69547	0.684173	0.533973	0.683847	0.53952	0.719292	0.642566	0.662579
Hordorf	HDC001	Germany	0.63399	0.598025	0.559365	0.457273	0.333973	0.580796	0.598477	0.677409
Serrahn	HHC001	Germany	0.671477	0.641636	0.671448	0.545751	0.486218	0.703608	0.622083	0.572144
Hohes Holz	HOC001	Germany	0.615005	0.548113	0.570954	0.353731	0.348741	0.581393	0.524053	0.576041
Jena	JEC001	Germany	0.800525	0.66948	0.675109	0.704591	0.530751	0.658353	0.742516	0.741615
Merzenhausen	MEBCK001	Germany	0.755002	0.704093	0.678471	0.63434	0.491754	0.522491	0.63376	0.645716
Olocau	OLC001	Spain	0.712539	0.716478	0.660238	0.578199	0.469677	0.728994	0.64491	0.627458
Petzenkirchen	PEC001	Austria	0.75212	0.636432	0.66921	0.505316	0.511316	0.652529	0.585185	0.712894
Rietholzbach	RIC001	Switzerland	0.74541	0.592397	0.565475	0.580311	0.487861	0.489478	0.546812	0.605136
Rollesbroich1	ROC001	Germany	0.660936	0.58308	0.538946	0.566379	0.442323	0.462298	0.491164	0.578802
Rollesbroich2	ROC002	Germany	0.625706	0.538909	0.533885	0.534946	0.41818	0.436472	0.466197	0.594216
Schoeneseiffen	RUBCDKR001	Germany	0.737996	0.628906	0.554982	0.640999	0.502753	0.657859	0.541938	0.59897
Gevenich	RUBCK002	Germany	0.758019	0.711985	0.674581	0.662156	0.502245	0.526301	0.62223	0.653185
Ruraue	RUBCK003	Germany	0.72315	0.66202	0.649665	0.613132	0.462573	0.507491	0.577506	0.67133
Wildenrath	RUBCK004	Germany	0.794695	0.69088	0.664598	0.673362	0.539062	0.696021	0.697427	0.693643
Heinsberg	RUC004	Germany	0.751437	0.691441	0.653089	0.631217	0.495527	0.66403	0.658083	0.666685
Kall	RUC005	Germany	0.703405	0.606796	0.5818	0.588668	0.513527	0.571461	0.608378	0.59837
Aachen	RUC006	Germany	0.738955	0.658238	0.660546	0.624801	0.490402	0.517297	0.633527	0.664867
Kleinhau1	RUC007	Germany	0.706266	0.573862	0.533809	0.61854	0.454297	0.637343	0.532968	0.628569
Saerheim	SAC001	Norway			0.632838		0.512354		0.696825	0.714328
Schaefertal1	SCC001	Germany	0.49854	0.408228	0.378212	0.29654	0.334065	0.39817	0.443781	0.722383
Schaefertal4	SCC004	Germany	0.488335	0.466346	0.456666	0.265955	0.309441	0.417977	0.393989	0.6812
Selhausen	SEC001	Germany	0.716736	0.665913	0.631631	0.595795	0.482123	0.69054	0.599774	0.6836
Toulouse	TOC001	France	0.795942	0.659024	0.6863	0.674288	0.518074	0.568367	0.759245
Voulund	VOC001	Denmark	0.763208	0.765661	0.645864	0.729173	0.582141	0.734551	0.72727	0.779677
Wildacker	WAC001	Germany	0.738128	0.69883	0.700094	0.629467	0.568258	0.718243	0.659149	0.625205
Wuestebach1	WUC001	Germany	0.495871	0.458291	0.456509	0.434411	0.31996	0.417322	0.421552	0.395567
Wuestebach2	WUC002	Germany	0.573751	0.483263	0.483946	0.503261	0.417908	0.589789	0.530875	0.496619
Baldry	AUS_SITE_001	Australia	0.869567	0.771298	0.781355	0.647614	0.658199	0.751546	0.843426
Daly	AUS_SITE_002	Australia	0.603261	0.546973	0.531854	0.383974	0.598095	0.578394	0.714908	0.726888
Gnangara	AUS_SITE_003	Australia	0.721092		0.696745	0.620188	0.287614	0.567011	0.700023	0.689804
Robson	AUS_SITE_006	Australia	0.612369	0.481186	0.579366	0.510409	0.430192		0.576879	0.469035
Temora	AUS_SITE_007	Australia	0.770684	0.706184	0.665534	0.585827	0.573172	0.718687	0.77514	0.831332
Tullochgorum	AUS_SITE_008	Australia	0.733073	0.71424	0.737993	0.534273	0.445066	0.631612	0.649362	0.745447
Tumbarumba	AUS_SITE_009	Australia	0.624849	0.56034	0.577037	0.543741	0.371202	0.519485	0.516337	0.545039
Weany Creek	AUS_SITE_010	Australia	0.790572	0.739418	0.646699	0.640124	0.635444	0.706155	0.818722	0.799482
Yanco	AUS_SITE_011	Australia	0.75166	0.647938	0.60138	0.576957	0.504969	0.710619	0.741933	0.778697
Hamilton	AUS_SITE_015	Australia	0.723635	0.605232	0.591338	0.496561	0.285296	0.687411	0.564974	0.656915
Bishes	AUS_SITE_018	Australia	0.786217	0.716418	0.538868	0.62298	0.474818	0.788556	0.795288	0.854318

## Sheet: 4MSE
CRNS site name	Station ID	Country	ERA5-Land	CFSv2	MERRA2	JRA55	GLDAS	CRA40	GLEAM	SMAPL4
Manitou Forest Tower	USA_SITE_004	USA	0.0126729	0.025373	0.00419026	0.00509808	0.00419305	0.00263091	0.00946845	0.00511636
Marshall Colorado	USA_SITE_006	USA	0.0103035	0.00341501	0.00262303	0.00313921	0.0205952	0.00260641	0.00555747	0.00525169
Kendall	USA_SITE_010	USA	0.0160439	0.0194951	0.00398576	0.00276866	0.00368948	0.00366714	0.00308135	0.00630995
Santa Rita Creosote	USA_SITE_011	USA	0.00909758	0.0167422	0.01058	0.00870591	0.0144906	0.0128238	0.0128827	0.00700468
SMAP-OK	USA_SITE_014	USA	0.00869663	0.00440509	0.00356799	0.012856	0.00529692	0.00294624	0.0185386	0.00720004
ARM-1	USA_SITE_015	USA	0.0157902	0.0114706	0.00548813	0.0308926	0.012548	0.00864147	0.0434059	0.0328984
Iowa Validation Site	USA_SITE_016	USA	0.00571359	0.00733592	0.00876395	0.0049218	0.00531131	0.00786124	0.0149183	0.00851304
San Pedro 2	USA_SITE_020	USA	0.00372009	0.0178196	0.00408367	0.00360166	0.00409252	0.00422865	0.00420336
Desert Chaparral UCI	USA_SITE_023	USA	0.0168017	0.0266564	0.011754	0.0090477	0.0112453	0.00382266	0.0107308	0.00411647
Coastal Sage UCI	USA_SITE_024	USA	0.00329401	0.0152086	0.00825628	0.00522398	0.0203578	0.010965	0.013553	0.00679035
Chestnut Ridge NOAA	USA_SITE_025	USA	0.0175336	0.00262913	0.00259217	0.00195608	0.00195273	0.00154635	0.009376
Bondville	USA_SITE_026	USA	0.0102273	0.0169753	0.0117727	0.0131602	0.0106119	0.0173792	0.00174645	0.00762403
Morgan Monroe	USA_SITE_027	USA	0.0121885	0.0210817	0.0109944	0.0161154	0.0136473	0.0137202	0.00601491
Mozark	USA_SITE_028	USA	0.00394104	0.00287778	0.00215408	0.00300024	0.00188538	0.00130827	0.00669978	0.00765095
Neb Field 3	USA_SITE_029	USA	0.0027623	0.00726291	0.00547567	0.0022839	0.00337611	0.00560047	0.00513258	0.00284807
Harvard Forest	USA_SITE_030	USA	0.0602641	0.0512847	0.0676259	0.0282088	0.0397109	0.0386354	0.0337827	0.0567773
Howland	USA_SITE_031	USA	0.0419331	0.0421253	0.0308476	0.017605	0.0167074	0.0311856	0.0202291	0.0329941
Tonzi Ranch	USA_SITE_032	USA	0.00296279	0.0060728	0.00542232	0.00640545	0.00633851	0.00490641	0.00769678	0.00444218
Soaproot	USA_SITE_033	USA	0.0159101	0.00610348	0.00787672	0.00401133	0.00145686	0.00198219	0.0134017
P301	USA_SITE_034	USA	0.0574053	0.0313213	0.0187321	0.00977106	0.00576566	0.00718868	0.0353421	0.00258091
Wind River	USA_SITE_035	USA	0.0030694	0.00101328	0.00443039	0.00352179	0.0101813	0.00709222	0.00663848
Hauser Farm South	USA_SITE_037	USA	0.0530868	0.0219303	0.0155445	0.00616127	0.00766388	0.0134199	0.00946584	0.00439116
Metolius	USA_SITE_038	USA	0.00133224	0.00198569	0.0115649	0.00623896	0.00522194	0.00789127	0.0172503	0.0102818
Rosemount	USA_SITE_041	USA	0.00345229	0.0069214	0.00445759	0.00845364	0.00606708	0.00337369	0.0234559	0.00401899
Park Falls	USA_SITE_042	USA	0.00387678	0.0100924	0.00281814	0.0132084	0.0178877	0.0132112	0.0163189
UMBS	USA_SITE_043	USA	0.00991967	0.00899767	0.00894013	0	0.000820104	0	0.0116614	0.00109253
Daniel Forest	USA_SITE_046	USA	0.0176066	0.0213334	0.013108	0.00855557	0.00644217	0.00464597	0.0174232	0.00884425
Tenderfoot Creek	USA_SITE_047	USA	0.0125864	0.0152043	0.00836584	0.00739713	0.00593554	0.00479194	0.00795214
Fort Peck	USA_SITE_048	USA	0.010804	0.0145503	0.00323371	0.00676233	0.00237345	0.00186272	0.0147568	0.00204438
JERC	USA_SITE_052	USA	0.00786827	0.0475788	0.0228878	0.0388919	0.00140501	0.0078428	0.0546073
Savannah River	USA_SITE_053	USA	0.011103	0.0096879	0.0168308	0.0441313	0.00175412	0.0107595	0.0527162
Freeman Ranch	USA_SITE_057	USA	0.0152819	0.00324862	0.00342903	0.00229244	0.00256252	0.00217527	0.00937413	0.00377911
Sevilleta New Grass	USA_SITE_058	USA	0.019824	0.0322216	0.0118371	0.0104517	0.00254524	0.0048804	0.0090917
Lucky Hills	USA_SITE_060	USA	0.00671462	0.0319798	0.0101656	0.00753978	0.0111866	0.010993	0.0122333
Flag Wildfire	USA_SITE_061	USA	0.00604651	0.00785248	0.00378715	0.0058718	0.00401778	0.00297357	0.00623933	0.00518522
Flag Ponderosa Pine	USA_SITE_062	USA	0.00356159	0.00668233	0.00692649	0.0117539	0.0082139	0.00664126	0.00442775	0.00427395
Beltsville	USA_SITE_065	USA	0.00795099	0.00320303	0.00289343	0.0056568	0.0067407	0.00602818	0.0155884
Jornada Mixed Shrubland	USA_SITE_072	USA	0.0185202	0.0352315	0.00655156	0.010946	0.00873532	0.00854172	0.00553059
AliceHolt	ALIC1	UK	0.0139608	0.00310584	0.00151434	0.00429882	0.0131856	0.00985669	0.00253015	0.0395125
Balruddery	BALRD	UK	0.00271777	0.00136151	0.00240021	0.00134524	0.00179825	0.00236193	0.0190527	0.00214914
BickleyHall	BICKL	UK	0.00374202	0.00279473	0.00498121	0.004201	0.0055441	0.00673289	0.00417496	0.00450774
BunnyPark	BUNNY	UK	0.0197149	0.0222834	0.0196791	0.0108975	0.00931075	0.0033187	0.0233888	0.0113035
Cardington	CARDT	UK	0.049577	0.0181601	0.0117334	0.0087256	0.016016	0.00524122	0.0216914	0.0367006
ChimneyMeadows	CHIMN	UK	0.00270665	0.00206716	0.00170991	0.00434634	0.00333099	0.00386501	0.00425774	0.006149
ChobhamCommon	CHOBH	UK	0.0349627	0.0521447	0.0538972	0.0652451	0.0926587	0.0801787	0.0638836	0.143536
Cochno	COCHN	UK	0.0154183	0.00374785	0.00249742	0.00795236	0.0140184	0.00412042	0.00418617	0.0053293
CocklePark	COCLP	UK	0.0082843	0.0136833	0.00549578		0.0155971		0.00439087	0.00808049
Crichton	CRICH	UK	0.00765166	0.0275255	0.00709492	0.0155019	0.0242727	0.021004	0.0375933	0.0109746
CwmGarw	CGARW	UK	0.0165444	0.0493634	0.0242229	0.0302274	0.0476291		0.013173	0.0312677
EasterBush	EASTB	UK	0.00478197	0.00376526	0.00269905	0.00314604	0.00538062	0.00418128	0.00274931	0.0047255
Elmsett	ELMST	UK	0.000831638	0.0245138	0.0123862		0.00625661	0.0185083	0.00145957	0.0065126
Euston	EUSTN	UK	0.00586581	0.00572136	0.0155077	0.0241137	0.0107056	0.009673	0.0232092	0.00259168
Fincham	FINCH	UK	0.00686078	0.00265405	0.00156123	0.00313722	0.00159252	0.00220901	0.0028076	0.0121683
GisburnForest	GISBN	UK	0.0415754	0.0565667	0.0503202	0.0695868	0.0903766	0.091047	0.0815875	0.038764
Glensaugh	GLENS	UK	0.0769796	0.0469619	0.0913511	0.0490529	0.0621722	0.0653252	0.0394086	0.0649037
Glenwherry	GLENW	UK	0.0494939		0.0430602	0.075097	0.0582327	0.0612734	0.0379958	0.0473224
Hadlow	HADLW	UK	0.00122994	0.00275585	0.00273863	0.00882725	0.0100278	0.0108525	0.00335849	0.00937554
HartwoodHome	HARTW	UK	0.00656423	0.0463058	0.0305511	0.0464808	0.035725	0.0579122	0.0122631	0.0640652
HarwoodForest	HARWD	UK	0.161343	0.181582	0.168846	0.212659	0.235053	0.228109	0.256805	0.166449
HenfaesFarm	HENFS	UK	0.0218678	0.0208245	0.0144565	0.0225825	0.0276499		0.00575079	0.0151598
Heytesbury	HYBRY	UK	0.00582439	0.0060342	0.00396821	0.00499575	0.00339988	0.00463191	0.00393488	0.00649698
Hillsborough	HILLB	UK	0.00697342	0.00570847	0.00289545	0.0111676	0.00445221	0.0119575	0.00366313	0.0130737
HollinHill	HOLLN	UK	0.00657481	0.0069529	0.0167413	0.0162997	0.0282677	0.0233614	0.00483544	0.0182434
Loddington	LODTN	UK	0.0300143	0.0193132	0.0290466	0.039898	0.0266255	0.0395541	0.0127768	0.00792919
LullingtonHeath	LULLN	UK	0.0140894	0.00214226	0.00457491	0.00607677	0.00287041		0.00394316	0.00957136
MoorHouse	MOORH	UK	0.0930336	0.0640937	0.060538	0.0932872	0.113123	0.107738	0.103142	0.0818589
Morley	MORLY	UK	0.0420899	0.00153375	0.00272434	0.00329623	0.00124303		0.00340779	0.00652752
NorthWyke	NWYKE	UK	0.0179892	0.0177836	0.0192733	0.0258552	0.0410605	0.0331214	0.00808933	0.0244546
Plynlimon	PLYNL	UK	0.0149313		0.0430106		0.0698051	0.0720113	0.0188862	0.0645058
PortonDown	PORTN	UK	0.00383893	0.00439847	0.00339941	0.0054423	0.00484934	0.00471459	0.0027897	0.00850823
Redhill	REDHL	UK	0.00907753	0.0053134	0.00472131	0.00125366	0.00166464	0.000922001	0.016248	0.00186768
Redmere	RDMER	UK	0.00939557	0.203887	0.159383	0.139344	0.172272	0.168212	0.178904	0.0120373
Riseholme	RISEH	UK	0.0018413	0.00227533	0.00254212	0.00261627	0.00172875	0.00532381	0.00498585	0.00468184
Rothamsted	ROTHD	UK	0.00679147	0.0053148	0.00312997	0.001818	0.00267713	0.00153279	0.00256871	0.00152124
Sheepdrove	SHEEP	UK	0.0105153	0.00317292	0.00298048	0.00524019	0.00478382	0.00558204	0.00434093	0.0116518
Sourhope	SOURH	UK	0.029747	0.033646	0.0199228	0.0403052	0.044906	0.0454871	0.0670479	0.0867454
SpenFarm	SPENF	UK	0.00555776	0.00213654	0.00233088	0.001416	0.00185648	0.00224279	0.00419398	0.00147711
Stiperstones	STIPS	UK	0.0336165	0.0538545	0.0471583	0.0511705	0.0676408	0.0751311	0.0206842	0.0474636
Stoughton	STGHT	UK	0.0161737	0.00240796	0.00239731	0.00197732	0.00269061	0.00727158	0.00279738	0.00872128
TadhamMoor	TADHM	UK	0.0780146	0.14436	0.101306	0.120569	0.116742	0.147347	0.0705261	0.0991004
TheLizard	LIZRD	UK	0.0375266		0.0559246		0.0916957		0.0335905	0.079697
Waddesdon	WADDN	UK	0.00865705	0.00388518	0.00479457	0.00988492	0.00806056	0.013297	0.00358471	0.00436065
Writtle	WRTTL	UK	0.0125561	0.00479279	0.00905453	0.0110951	0.00700213	0.00747507	0.00544432	0.011485
Aas	AAC001	Norway	0.00212458	0.00315289	0.007303	0.0130919	0.00373814	0.00448769	0.0241013	0.0188502
Acheleschwaig	ACC001	Germany	0.00314764	0.00290391	0.00233225	0.00264453	0.00440783	0.00502495	0.00527606	0.00286893
Agia	AGCK003	Greece	0.00771576	0.0254728	0.00565777	0.00509157	0.00547993	0.00499156	0.0112742	0.00489446
Alento1	ALC001	Italy	0.00713728		0.00216702	0.00113792	0.00144563		0.00326211	0.00214061
Alento2	ALC002	Italy	0.00822031		0.00355401	0.0015572	0.00200718		0.00500895	0.0023399
Calderona1	CAC001	Spain	0.00193245	0.00095565	0.00107664	0.00390494	0.00149687		0.00311091	0.00293274
Crolles	CRC001	France	0.0143243	0.0033753	0.00383508	0.00267208	0.00706315	0.00252756	0.00933985	0.00390738
Cunnersdorf	CUC001	Germany	0.0153267	0.00928377	0.00783709	0.00513377	0.00719094	0.00392797	0.0111868	0.00631082
Derlo	DEC001	Poland	0.0221504	0.00343391	0.00235702	0.0197092	0.00473344	0.00314932	0.0132092	0.00249568
Fendt	FEC001	Germany	0.00188615	0.00306865	0.00573724	0.00881307	0.0134763	0.0113109	0.00194369	0.00719747
Fuerstensee	FSC001	Germany	0.0374486	0.0282032	0.0188141	0.0230879	0.0146815	0.0109032	0.0253309	0.00407362
Grosses Bruch	GBC001	Germany	0.0106237	0.00198347	0.00350739	0.0021271	0.00326813	0.00218228	0.0083047	0.0033189
Gludsted	GLC001	Denmark	0.00829612	0.00586462	0.00805563	0.0066989	0.0128887	0.0107863	0.0165449	0.023189
Harrild	HAC001	Denmark	0.0292201	0.0192185	0.0228227	0.0149971	0.0384799	0.0340814	0.0093435	0.0468291
Hordorf	HDC001	Germany	0.00886841	0.00380371	0.00407979	0.00445239	0.0033473	0.00358313	0.0124304	0.00241899
Serrahn	HHC001	Germany	0.0392774	0.0297498	0.0198497	0.0251757	0.0163572	0.0125227	0.0260437	0.00179933
Hohes Holz	HOC001	Germany	0.0237217	0.00302619	0.00910024	0.00524191	0.00948994	0.00369601	0.0201755	0.00866706
Jena	JEC001	Germany	0.0247517	0.00662147	0.0109219	0.0128224	0.00866771	0.00710262	0.0235555	0.00352926
Merzenhausen	MEBCK001	Germany	0.0080782	0.00333414	0.00385145	0.0034404	0.00432883	0.00387016	0.0102899	0.00343546
Olocau	OLC001	Spain	0.00882349	0.00412915	0.00405588	0.00230481	0.00547002	0.00221506	0.0104429	0.00512793
Petzenkirchen	PEC001	Austria	0.00233419	0.00457423	0.0067461	0.00622357	0.00921861	0.0087368	0.00598791	0.00793047
Rietholzbach	RIC001	Switzerland	0.00257534	0.00505989	0.00590992	0.0092478	0.0130375	0.0123273	0.00278326	0.0100656
Rollesbroich1	ROC001	Germany	0.00294974	0.00502477	0.0113372	0.0103681	0.0104602	0.0114481	0.00471049	0.0121913
Rollesbroich2	ROC002	Germany	0.00388502	0.00538417	0.0109141	0.0106934	0.010939	0.0119549	0.00593423	0.0100486
Schoeneseiffen	RUBCDKR001	Germany	0.0022254	0.00238924	0.00451952	0.00274675	0.00422631	0.0047729	0.00582907	0.00533665
Gevenich	RUBCK002	Germany	0.00659616	0.00520944	0.00582677	0.003561	0.00410423	0.00412857	0.00869898	0.00379286
Ruraue	RUBCK003	Germany	0.00344864	0.00899842	0.00854759	0.00256409	0.00338334	0.0034261	0.00432741	0.00239474
Wildenrath	RUBCK004	Germany	0.0259646	0.000841159	0.0029364	0.0124253	0.00855946	0.00320371	0.0184851	0.00599797
Heinsberg	RUC004	Germany	0.00725173	0.00738514	0.00495678	0.0023779	0.00258448	0.00315164	0.00441088	0.00246445
Kall	RUC005	Germany	0.00253778	0.00334654	0.00630896	0.00464799	0.00640138	0.0103756	0.00324392	0.00538421
Aachen	RUC006	Germany	0.00260741	0.0365823	0.0273951	0.0109236	0.0107468	0.0126746	0.00326152	0.0143066
Kleinhau1	RUC007	Germany	0.00282312	0.00360503	0.00423049	0.00335849	0.00451597	0.00495112	0.00817163	0.00680884
Saerheim	SAC001	Norway			0.0195871		0.0236203		0.0385236	0.018911
Schaefertal1	SCC001	Germany	0.00796299	0.00732496	0.00512888	0.00395028	0.00609537	0.00429801	0.0205827	0.00219169
Schaefertal4	SCC004	Germany	0.0289159	0.0255898	0.0175854	0.0118988	0.0212607	0.0106385	0.0485382	0.00795549
Selhausen	SEC001	Germany	0.00289671	0.0124425	0.0112201	0.00395744	0.00463458	0.0049911	0.00427152	0.0052101
Toulouse	TOC001	France	0.0355598	0.0326148	0.0137994	0.0195228	0.0141898	0.00846447	0.0328396
Voulund	VOC001	Denmark	0.00333615	0.00951432	0.0108651	0.0147186	0.00168121	0.00277333	0.0493323	0.00180928
Wildacker	WAC001	Germany	0.0416876	0.0302042	0.0218516	0.0266492	0.0168372	0.0123294	0.0289415	0.00142485
Wuestebach1	WUC001	Germany	0.00558822	0.00932631	0.0194622	0.0158301	0.0183849	0.0191949	0.00436448	0.0245276
Wuestebach2	WUC002	Germany	0.00859154	0.011654	0.0216418	0.0179932	0.0215077	0.0217107	0.00731505	0.0278683
Baldry	AUS_SITE_001	Australia	0.00639915	0.00366813	0.00639623	0.0087334	0.00484123	0.00579341	0.0149588
Daly	AUS_SITE_002	Australia	0.0409451	0.0171596	0.0131845	0.0327477	0.0235255	0.0180948	0.0326123	0.0117358
Gnangara	AUS_SITE_003	Australia	0.0177703		0.00955806	0.0255059	0.0190047	0.0291731	0.0358469	0.00204733
Robson	AUS_SITE_006	Australia	0.0166082	0.00300044	0.00396783	0.00604723	0.00392594		0.0143622	0.00429779
Temora	AUS_SITE_007	Australia	0.00411089	0.00575616	0.00511837	0.00525681	0.00367991	0.0041635	0.00684089	0.00203905
Tullochgorum	AUS_SITE_008	Australia	0.0230488	0.00886051	0.0181439	0.00632746	0.0104374	0.0181545	0.0194224	0.0230841
Tumbarumba	AUS_SITE_009	Australia	0.00770987	0.0295162	0.0428646	0.0242617	0.0379461	0.0255959	0.00804009	0.0478377
Weany Creek	AUS_SITE_010	Australia	0.00646496	0.0026216	0.00865224	0.00445023	0.00790633	0.0049461	0.0052901	0.00314183
Yanco	AUS_SITE_011	Australia	0.00448588	0.00931283	0.00592013	0.00586219	0.0059584	0.00670458	0.00517069	0.00501163
Hamilton	AUS_SITE_015	Australia	0.00559703	0.0133448	0.00853888	0.0247345	0.0193555	0.0114237	0.0112753	0.0111391
Bishes	AUS_SITE_018	Australia	0.00801292	0.00106551	0.00732084	0.00159297	0.00483179	0.00147233	0.0190713	0.00115712

## Sheet: 5ubRMSE
CRNS site name	Station ID	Country	ERA5-Land	CFSv2	MERRA2	JRA55	GLDAS	CRA40	GLEAM	SMAPL4
Manitou Forest Tower	USA_SITE_004	USA	0.0601993	0.0628187	0.0569202	0.0600873	0.0632371	0.0512176	0.049583	0.0571774
Marshall Colorado	USA_SITE_006	USA	0.044806	0.0559474	0.0511026	0.0542776	0.0596179	0.0433636	0.042944	0.049303
Kendall	USA_SITE_010	USA	0.0418984	0.0484939	0.0449818	0.0492418	0.0422274	0.038836	0.0391961	0.057607
Santa Rita Creosote	USA_SITE_011	USA	0.033743	0.0339817	0.0320005	0.0483049	0.0336072	0.0258238	0.0248866	0.0241907
SMAP-OK	USA_SITE_014	USA	0.0464864	0.0536527	0.0596278	0.0598408	0.0564107	0.0500759	0.049768	0.0528994
ARM-1	USA_SITE_015	USA	0.0477089	0.0500934	0.0525954	0.0548511	0.0506977	0.0500406	0.0539591	0.0450834
Iowa Validation Site	USA_SITE_016	USA	0.0714239	0.083744	0.0700123	0.0689649	0.0694008	0.0692139	0.0648561	0.0630351
San Pedro 2	USA_SITE_020	USA	0.0607673	0.0380637	0.0486092	0.0556754	0.0444385	0.0465366	0.0400586
Desert Chaparral UCI	USA_SITE_023	USA	0.0339812	0.0250867	0.0284367	0.0324501	0.0323673	0.0289453	0.0238269	0.0290504
Coastal Sage UCI	USA_SITE_024	USA	0.0442916	0.0529336	0.0612893	0.0720246	0.074218	0.0722986	0.0545622	0.0661916
Chestnut Ridge NOAA	USA_SITE_025	USA	0.0491904	0.0423014	0.0488952	0.0437891	0.0406106	0.0367593	0.0463273
Bondville	USA_SITE_026	USA	0.0555613	0.0553457	0.0477802	0.0374332	0.044576	0.0462741	0.0335065	0.0483047
Morgan Monroe	USA_SITE_027	USA	0.0450131	0.045523	0.0458433	0.0331053	0.0450246	0.0387912	0.0342983
Mozark	USA_SITE_028	USA	0.0453168	0.0438369	0.0375729	0.0501499	0.043361	0.035934	0.0447529	0.039908
Neb Field 3	USA_SITE_029	USA	0.0502241	0.0578409	0.048371	0.0456521	0.0507101	0.0453268	0.0450828	0.0458196
Harvard Forest	USA_SITE_030	USA	0.0575148	0.0712716	0.0568616	0.0606439	0.0711855	0.0673977	0.0662418	0.0529964
Howland	USA_SITE_031	USA	0.0506277	0.0633032	0.050533	0.0522898	0.0537769	0.0640374	0.0548305	0.0521734
Tonzi Ranch	USA_SITE_032	USA	0.0498787	0.0616592	0.0734194	0.0784713	0.0762602	0.0679071	0.0621549	0.0659584
Soaproot	USA_SITE_033	USA	0.036138	0.0435543	0.0434727	0.0573814	0.037347	0.035378	0.0334663
P301	USA_SITE_034	USA	0.0311052	0.0240939	0.0211033	0.0243393	0.0247544	0.0275174	0.0314143	0.009279
Wind River	USA_SITE_035	USA	0.0554271	0.031844	0.0445746	0.0347944	0.0379176	0.0345697	0.0355352
Hauser Farm South	USA_SITE_037	USA	0.0720333	0.0693745	0.0637019	0.064097	0.0593345	0.0702258	0.0616924	0.0595703
Metolius	USA_SITE_038	USA	0.0359961	0.0405517	0.0617219	0.0342663	0.0294232	0.0326702	0.0264779	0.0277213
Rosemount	USA_SITE_041	USA	0.055233	0.0673971	0.0564466	0.0407172	0.0494086	0.0549104	0.0413645	0.0482317
Park Falls	USA_SITE_042	USA	0.0296168	0.0327967	0.0352594	0.0331539	0.0341818	0.0306627	0.031438
UMBS	USA_SITE_043	USA	0.0252841	0.0296175	0.0313914	0	0.0282192	0	0.0251588	0.0287706
Daniel Forest	USA_SITE_046	USA	0.0635848	0.0778694	0.0855435	0.0741437	0.0756197	0.0661041	0.0727343	0.0827973
Tenderfoot Creek	USA_SITE_047	USA	0.0658142	0.0792978	0.0870233	0.0758376	0.0749435	0.0688814	0.0814897
Fort Peck	USA_SITE_048	USA	0.0399731	0.0383077	0.0465333	0.0528244	0.0395271	0.0385259	0.0370658	0.0358336
JERC	USA_SITE_052	USA	0.0418639	0.0387798	0.048614	0.0337449	0.0350396	0.0275207	0.0367782
Savannah River	USA_SITE_053	USA	0.0393298	0.0348917	0.0393213	0.024398	0.0265578	0.0206296	0.0320992
Freeman Ranch	USA_SITE_057	USA	0.0391178	0.0420325	0.0408548	0.0472392	0.0457883	0.0397548	0.0449309	0.0431037
Sevilleta New Grass	USA_SITE_058	USA	0.0407615	0.0338618	0.026819	0.0364332	0.0269332	0.0267863	0.0223516
Lucky Hills	USA_SITE_060	USA	0.0802443	0.0830437	0.0735801	0.0803055	0.0757704	0.072108	0.0721634
Flag Wildfire	USA_SITE_061	USA	0.0444496	0.0580927	0.0615594	0.0604753	0.0572091	0.0510278	0.0458298	0.0397309
Flag Ponderosa Pine	USA_SITE_062	USA	0.0526032	0.0751058	0.0752133	0.0741741	0.0673849	0.0607743	0.0574684	0.0642689
Beltsville	USA_SITE_065	USA	0.0573891	0.0529346	0.0525851	0.0724709	0.0741203	0.0768782	0.0623784
Jornada Mixed Shrubland	USA_SITE_072	USA	0.0450237	0.0374348	0.0327318	0.0419788	0.0381136	0.0274853	0.0239303
AliceHolt	ALIC1	UK	0.0442693	0.0294145	0.0277209	0.0367233	0.0335599	0.0274221	0.02983	0.0303268
Balruddery	BALRD	UK	0.024507	0.0365641	0.0442845	0.0354939	0.0348626	0.0392539	0.0284561	0.0441925
BickleyHall	BICKL	UK	0.0467611	0.0523546	0.0702103	0.0645203	0.0595543	0.0495	0.0625961	0.0620798
BunnyPark	BUNNY	UK	0.0222829	0.0340625	0.0475767	0.0372407	0.0409556	0.0396321	0.0335407	0.0416764
Cardington	CARDT	UK	0.0431629	0.0416391	0.0473918	0.0528177	0.0522398	0.0376788	0.0471206	0.0484438
ChimneyMeadows	CHIMN	UK	0.0468458	0.0372896	0.0404975	0.0470313	0.0402462	0.0344305	0.0437418	0.0330751
ChobhamCommon	CHOBH	UK	0.0837474	0.0785893	0.0763981	0.0877183	0.0929217	0.0698507	0.0834752	0.0808594
Cochno	COCHN	UK	0.0613074	0.0447652	0.0499831	0.0567457	0.0511217	0.0450275	0.0469112	0.0523741
CocklePark	COCLP	UK	0.062343	0.0516388	0.060715		0.0532311		0.0431108	0.044686
Crichton	CRICH	UK	0.05702	0.0534011	0.0618757	0.064812	0.0610769	0.0589704	0.0649884	0.0583748
CwmGarw	CGARW	UK	0.0590112	0.0546131	0.0679551	0.0723895	0.0648181		0.0676867	0.0665582
EasterBush	EASTB	UK	0.0316311	0.0360898	0.0458568	0.040872	0.0380745	0.0350578	0.0511759	0.0398592
Elmsett	ELMST	UK	0.0288051	0.036475	0.0547396		0.0402889	0.0375601	0.0382198	0.0473447
Euston	EUSTN	UK	0.0263895	0.0348006	0.049553	0.0440041	0.0403501	0.0404663	0.0384806	0.0509014
Fincham	FINCH	UK	0.0356659	0.0324539	0.0393023	0.0376934	0.0350307	0.0377341	0.032971	0.0412943
GisburnForest	GISBN	UK	0.0543583	0.0559596	0.0612619	0.0586519	0.058764	0.0569207	0.0590151	0.0593465
Glensaugh	GLENS	UK	0.0735025	0.0771141	0.0793599	0.0755251	0.0756938	0.0855893	0.0755322	0.0830172
Glenwherry	GLENW	UK	0.0877409		0.0912312	0.100476	0.0917671	0.0862318	0.0907418	0.0814612
Hadlow	HADLW	UK	0.0350394	0.040097	0.0520853	0.0439992	0.04673	0.0426983	0.0509362	0.0572731
HartwoodHome	HARTW	UK	0.0595017	0.0571607	0.06429	0.0651726	0.0597758	0.0573064	0.0624682	0.0491947
HarwoodForest	HARWD	UK	0.130094	0.134901	0.143712	0.138149	0.13625	0.132645	0.139208	0.140093
HenfaesFarm	HENFS	UK	0.0547473	0.0692317	0.0633626	0.0659812	0.0650196		0.0628384	0.0658684
Heytesbury	HYBRY	UK	0.0673449	0.0490442	0.062839	0.0594318	0.0581523	0.0525935	0.0627176	0.0525522
Hillsborough	HILLB	UK	0.0541189	0.0488972	0.052353	0.0544001	0.0546647	0.0462287	0.0526681	0.0521563
HollinHill	HOLLN	UK	0.0515214	0.0596273	0.0703908	0.0694387	0.06029	0.0552497	0.0605803	0.0603558
Loddington	LODTN	UK	0.0628042	0.0539717	0.0703079	0.0623853	0.0595265	0.053666	0.0570738	0.0651647
LullingtonHeath	LULLN	UK	0.0526823	0.0437841	0.0656978	0.0585282	0.0485619		0.0575612	0.0512226
MoorHouse	MOORH	UK	0.100072	0.100746	0.100998	0.100017	0.100052	0.0959247	0.0969418	0.0994609
Morley	MORLY	UK	0.0337494	0.0299909	0.0454862	0.035534	0.0350566		0.0337444	0.0417151
NorthWyke	NWYKE	UK	0.0615339	0.0733347	0.068452	0.07844	0.058673	0.0632708	0.0717673	0.0595574
Plynlimon	PLYNL	UK	0.0693861		0.0719825		0.0683886	0.0639942	0.0641239	0.0725564
PortonDown	PORTN	UK	0.0544549	0.040433	0.0579107	0.0522852	0.0498263	0.0457655	0.0503387	0.0498925
Redhill	REDHL	UK	0.0373128	0.0276032	0.0426771	0.0343103	0.0363415	0.0291305	0.0378933	0.0399028
Redmere	RDMER	UK	0.0828462	0.0769705	0.0851064	0.0808097	0.083043	0.0910709	0.0776449	0.102126
Riseholme	RISEH	UK	0.0428069	0.0379281	0.0500931	0.0399263	0.0400723	0.0391416	0.0376159	0.0443353
Rothamsted	ROTHD	UK	0.0335699	0.0372441	0.0457585	0.0411982	0.0416448	0.0369798	0.0350972	0.0389164
Sheepdrove	SHEEP	UK	0.0437531	0.0464461	0.0525337	0.0507452	0.0499035	0.046065	0.0505258	0.0486123
Sourhope	SOURH	UK	0.0797208	0.0866133	0.0895034	0.0914134	0.0897755	0.0838035	0.0938288	0.0685307
SpenFarm	SPENF	UK	0.0381472	0.0355879	0.0476636	0.0376262	0.0394209	0.0366209	0.036889	0.0378361
Stiperstones	STIPS	UK	0.0762289	0.0822709	0.0911153	0.0886644	0.0894125	0.0791492	0.0924077	0.0891793
Stoughton	STGHT	UK	0.0283483	0.0320905	0.0467298	0.0376812	0.0390493	0.0359686	0.0341344	0.0425197
TadhamMoor	TADHM	UK	0.101133	0.102038	0.103172	0.10456	0.103884	0.102821	0.10107	0.103913
TheLizard	LIZRD	UK	0.0592349		0.069517		0.0666273		0.0606172	0.0661383
Waddesdon	WADDN	UK	0.0602142	0.0563258	0.0560214	0.0657789	0.0566323	0.0496474	0.0597748	0.0431865
Writtle	WRTTL	UK	0.0657963	0.0668041	0.0872601	0.0783858	0.081442	0.0699682	0.0715182	0.0873355
Aas	AAC001	Norway	0.0460854	0.0475705	0.0651593	0.0602991	0.0509661	0.0553451	0.0585662	0.0544944
Acheleschwaig	ACC001	Germany	0.0404807	0.0455408	0.0470346	0.0489877	0.0486206	0.0404592	0.0491487	0.0484063
Agia	AGCK003	Greece	0.0566623	0.0714803	0.072157	0.0688269	0.0706455	0.0656535	0.067942	0.0625907
Alento1	ALC001	Italy	0.030292		0.0368454	0.0332407	0.037861		0.039847	0.038891
Alento2	ALC002	Italy	0.0375059		0.0465265	0.0386521	0.042931		0.0480892	0.0480986
Calderona1	CAC001	Spain	0.0381848	0.030424	0.0327104	0.0451943	0.0380166		0.0437484	0.0345596
Crolles	CRC001	France	0.0464015	0.0524688	0.0589103	0.05172	0.0507659	0.0499542	0.0517478	0.0598562
Cunnersdorf	CUC001	Germany	0.053896	0.0631707	0.0753682	0.0643529	0.0656083	0.0626601	0.0584871	0.0689825
Derlo	DEC001	Poland	0.0305932	0.0357504	0.040255	0.0459434	0.0367888	0.0363676	0.0356693	0.0384187
Fendt	FEC001	Germany	0.0388369	0.0400043	0.0383812	0.0442667	0.0376291	0.039516	0.0440571	0.0382602
Fuerstensee	FSC001	Germany	0.0302194	0.0395584	0.0516081	0.0429332	0.0436176	0.0420783	0.0380561	0.0448525
Grosses Bruch	GBC001	Germany	0.0419177	0.0395906	0.0513996	0.0458052	0.04736	0.0459656	0.0415822	0.0408024
Gludsted	GLC001	Denmark	0.0671211	0.0762288	0.0868851	0.0817117	0.0771137	0.0691048	0.0750365	0.0838035
Harrild	HAC001	Denmark	0.0884933	0.0933511	0.10747	0.0948515	0.0937117	0.0941794	0.0935996	0.0977062
Hordorf	HDC001	Germany	0.0549248	0.052547	0.0621099	0.0600348	0.0553737	0.0591139	0.054356	0.0478948
Serrahn	HHC001	Germany	0.0302867	0.0335643	0.0400602	0.0344206	0.0328431	0.0289957	0.0299039	0.0424013
Hohes Holz	HOC001	Germany	0.0433416	0.0391921	0.036196	0.0358251	0.0359402	0.034826	0.0319073	0.0284605
Jena	JEC001	Germany	0.0268641	0.0287379	0.0321624	0.031905	0.0269193	0.0299803	0.0255696	0.0310751
Merzenhausen	MEBCK001	Germany	0.0299042	0.0421508	0.0568825	0.0455503	0.0528339	0.0533928	0.0456808	0.0509572
Olocau	OLC001	Spain	0.0424723	0.0346896	0.0336426	0.0477902	0.0400577	0.0333498	0.0407309	0.0342478
Petzenkirchen	PEC001	Austria	0.0480664	0.0581771	0.0642422	0.0628012	0.0554702	0.0580049	0.0638975	0.0548631
Rietholzbach	RIC001	Switzerland	0.0452208	0.051193	0.0553741	0.054832	0.051764	0.0512547	0.0524917	0.0470018
Rollesbroich1	ROC001	Germany	0.0525172	0.0642991	0.0703786	0.0630071	0.0649472	0.0657731	0.0675167	0.0629467
Rollesbroich2	ROC002	Germany	0.061427	0.0693562	0.0724831	0.0703731	0.0724499	0.0737094	0.0752063	0.0572487
Schoeneseiffen	RUBCDKR001	Germany	0.0346702	0.0469366	0.0552622	0.0470652	0.051409	0.0538173	0.0546514	0.0493356
Gevenich	RUBCK002	Germany	0.0366383	0.0495662	0.0643624	0.0549898	0.0597133	0.0623441	0.056479	0.0589657
Ruraue	RUBCK003	Germany	0.0406944	0.0433263	0.0585302	0.0499825	0.0578126	0.0566502	0.0498095	0.0485862
Wildenrath	RUBCK004	Germany	0.0275433	0.0282615	0.0383395	0.032393	0.0348128	0.0315172	0.0322705	0.0283237
Heinsberg	RUC004	Germany	0.0359076	0.040974	0.0539524	0.0451569	0.0508295	0.0439018	0.0451754	0.0428104
Kall	RUC005	Germany	0.0452967	0.0576938	0.0652105	0.0554374	0.0551865	0.0576177	0.0511003	0.0553923
Aachen	RUC006	Germany	0.036885	0.0466891	0.0595378	0.0499926	0.0547412	0.0548551	0.0487238	0.0510632
Kleinhau1	RUC007	Germany	0.0394835	0.0534828	0.0607159	0.0531462	0.0611906	0.062864	0.0620221	0.0550473
Saerheim	SAC001	Norway			0.0558265		0.0547742		0.0535735	0.0386125
Schaefertal1	SCC001	Germany	0.0444182	0.0598054	0.063709	0.0626726	0.0604374	0.065565	0.0573504	0.0464436
Schaefertal4	SCC004	Germany	0.0354083	0.0440589	0.0442656	0.0562052	0.0406789	0.0522515	0.0401512	0.0287134
Selhausen	SEC001	Germany	0.048796	0.0567405	0.0676893	0.059084	0.0639462	0.0649634	0.0591914	0.0613373
Toulouse	TOC001	France	0.0271559	0.034178	0.0378294	0.0406939	0.0366053	0.0395232	0.0334781
Voulund	VOC001	Denmark	0.03269	0.0329624	0.0534371	0.0345718	0.0344798	0.0404518	0.0371014	0.0403869
Wildacker	WAC001	Germany	0.0329468	0.0277968	0.0317371	0.0343728	0.0259909	0.027139	0.0261053	0.0360447
Wuestebach1	WUC001	Germany	0.0519645	0.0610838	0.0660114	0.055449	0.0557945	0.0548577	0.0575671	0.0585288
Wuestebach2	WUC002	Germany	0.0739703	0.0835979	0.084116	0.0818371	0.078301	0.0803475	0.080647	0.0769943
Baldry	AUS_SITE_001	Australia	0.0423108	0.0604834	0.0719115	0.0779574	0.0683923	0.0659016	0.0654614
Daly	AUS_SITE_002	Australia	0.0689184	0.0560577	0.0616716	0.0691111	0.0561697	0.0612742	0.0575604	0.0418726
Gnangara	AUS_SITE_003	Australia	0.033848		0.0202701	0.0377662	0.0297878	0.0203954	0.0495754	0.0193997
Robson	AUS_SITE_006	Australia	0.0449159	0.0529172	0.0571448	0.0541217	0.0476943		0.0406848	0.0638974
Temora	AUS_SITE_007	Australia	0.0583879	0.061888	0.0689802	0.0724688	0.0592452	0.0643554	0.0618267	0.0447494
Tullochgorum	AUS_SITE_008	Australia	0.0634354	0.0752783	0.0593003	0.0790394	0.0717653	0.0673226	0.0656806	0.0413796
Tumbarumba	AUS_SITE_009	Australia	0.0697762	0.070839	0.0832929	0.0844784	0.0820368	0.0818817	0.0830254	0.094702
Weany Creek	AUS_SITE_010	Australia	0.057095	0.0432128	0.0507778	0.0553966	0.0462375	0.0496722	0.0421957	0.0304985
Yanco	AUS_SITE_011	Australia	0.0669484	0.0714251	0.0768353	0.0747604	0.076281	0.0727036	0.0717629	0.0560017
Hamilton	AUS_SITE_015	Australia	0.0676077	0.0944443	0.0817905	0.097545	0.0892132	0.094743	0.0786026	0.0760337
Bishes	AUS_SITE_018	Australia	0.0357575	0.0320042	0.0388576	0.031573	0.0356102	0.0379262	0.0320772	0.0218566

## Sheet: 6Bias
CRNS site name	Station ID	Country	ERA5-Land	CFSv2	MERRA2	JRA55	GLDAS	CRA40	GLEAM	SMAPL4
Manitou Forest Tower	USA_SITE_004	USA	0.095135	0.146385	0.0308534	0.0385921	-0.0140023	0.00299196	0.0837327	-0.0430112
Marshall Colorado	USA_SITE_006	USA	0.0910871	0.0169206	0.00356711	-0.0139456	0.130547	0.0269603	0.0609435	-0.0531313
Kendall	USA_SITE_010	USA	0.119537	0.130937	0.0443093	0.018574	0.0436706	0.0464713	0.0393154	-0.0547303
Santa Rita Creosote	USA_SITE_011	USA	0.0892158	0.124852	0.0977567	0.0798342	0.115592	0.11026	0.110741	0.0801265
SMAP-OK	USA_SITE_014	USA	0.0808483	0.0390839	-0.00372032	0.0963144	0.0459993	0.0209665	0.126739	-0.0663642
ARM-1	USA_SITE_015	USA	0.116254	0.0946683	0.0521808	0.166988	0.0998934	0.0783473	0.201235	0.175691
Iowa Validation Site	USA_SITE_016	USA	0.0247841	-0.0180459	-0.0621625	0.0129435	-0.022288	-0.055431	0.103507	-0.0673997
San Pedro 2	USA_SITE_020	USA	-0.00552931	0.127953	0.041507	0.0224622	0.0460371	0.0454409	0.0509905
Desert Chaparral UCI	USA_SITE_023	USA	0.125089	0.16133	0.104621	0.0894151	0.100986	0.0546362	0.100813	0.0572107
Coastal Sage UCI	USA_SITE_024	USA	0.0365079	0.111389	0.0670894	-0.0061604	0.121865	0.0757593	0.102844	0.0491043
Chestnut Ridge NOAA	USA_SITE_025	USA	0.122951	0.0290171	0.0142993	-0.00640555	-0.0174815	-0.0140305	0.0850442
Bondville	USA_SITE_026	USA	-0.0845067	-0.117955	-0.0974196	-0.108441	-0.0928743	-0.123445	-0.0249834	-0.0727469
Morgan Monroe	USA_SITE_027	USA	-0.100821	-0.137884	-0.0943155	-0.122559	-0.107809	-0.110532	-0.0695704
Mozark	USA_SITE_028	USA	0.0434526	0.0309316	0.027255	0.0220475	0.00241765	-0.00417917	0.0685393	0.0778406
Neb Field 3	USA_SITE_029	USA	-0.0155161	-0.0625984	-0.0560069	-0.0141614	-0.0283819	-0.0595542	0.0556853	-0.0273854
Harvard Forest	USA_SITE_030	USA	-0.238658	-0.214959	-0.25376	-0.156629	-0.186134	-0.184648	-0.171454	-0.232316
Howland	USA_SITE_031	USA	-0.198422	-0.195243	-0.168212	-0.121951	-0.117545	-0.164581	-0.131241	-0.173995
Tonzi Ranch	USA_SITE_032	USA	0.0218125	0.0476685	-0.00581494	-0.0158076	0.0229118	-0.0172247	0.0619267	-0.00973136
Soaproot	USA_SITE_033	USA	0.120852	0.0648693	0.0773845	0.0268582	0.00794872	0.0270482	0.110827
P301	USA_SITE_034	USA	0.237567	0.175331	0.13523	0.095807	0.0717859	0.0801991	0.185353	0.0499489
Wind River	USA_SITE_035	USA	-0.000392233	0.000446729	-0.0494508	-0.0480863	-0.0935143	-0.0768005	0.0733276
Hauser Farm South	USA_SITE_037	USA	0.218862	0.130843	0.107185	0.0453309	0.064382	0.0921451	0.0752447	0.0291053
Metolius	USA_SITE_038	USA	0.00610346	0.0184982	0.0880763	0.0711719	0.0660053	0.0826107	0.128645	0.0975402
Rosemount	USA_SITE_041	USA	0.0200759	0.0487974	0.0356776	0.0824411	0.0602248	0.0189732	0.147464	0.0411633
Park Falls	USA_SITE_042	USA	0.054775	0.094961	0.0396973	0.110046	0.129307	0.110778	0.12382
UMBS	USA_SITE_043	USA	0.0963367	0.0901165	0.0891924	0	-0.00492383	0	0.105018	0.0162971
Daniel Forest	USA_SITE_046	USA	0.116477	0.123591	0.0761339	0.055343	0.0269922	0.0167293	0.110169	0.0446844
Tenderfoot Creek	USA_SITE_047	USA	0.0908844	0.0944648	0.0283149	0.0406521	-0.0180456	-0.00727868	0.0363239
Fort Peck	USA_SITE_048	USA	0.0959543	0.114384	0.0327074	0.0630376	0.028497	-0.0194797	0.115688	0.0276057
JERC	USA_SITE_052	USA	0.0782094	0.214653	0.143268	0.194303	0.01334	0.0841775	0.230771
Savannah River	USA_SITE_053	USA	0.097762	0.0920403	0.123636	0.208654	0.0323937	0.101658	0.227347
Freeman Ranch	USA_SITE_057	USA	0.117271	0.0385054	0.0419601	0.00786636	0.0216072	-0.0244035	0.0857684	0.0438513
Sevilleta New Grass	USA_SITE_058	USA	0.134774	0.176284	0.105444	0.0955279	0.0426676	0.0645259	0.0926962
Lucky Hills	USA_SITE_060	USA	0.0167729	0.158398	0.0689673	0.033116	0.0738285	0.0761465	0.083848
Flag Wildfire	USA_SITE_061	USA	0.0638124	0.0669322	-0.000250249	-0.0470842	-0.0273319	-0.0192728	0.0643454	0.0600727
Flag Ponderosa Pine	USA_SITE_062	USA	0.0282082	0.0323095	-0.0356638	-0.0790851	-0.060623	-0.0543081	0.0335643	0.0120922
Beltsville	USA_SITE_065	USA	0.0682622	-0.0200715	-0.0114074	0.0202077	0.0353642	0.0110458	0.108167
Jornada Mixed Shrubland	USA_SITE_072	USA	0.128433	0.183933	0.0740349	0.0958407	0.0853465	0.0882439	0.0704163
AliceHolt	ALIC1	UK	-0.109554	-0.0473406	-0.0273193	-0.0543232	-0.109818	-0.095421	-0.0405072	-0.196452
Balruddery	BALRD	UK	0.046016	0.00502348	0.0209776	-0.00927602	-0.0241547	-0.0286674	-0.135068	-0.0140465
BickleyHall	BICKL	UK	0.0394547	-0.00743637	0.00738492	-0.00636498	-0.0447148	-0.0654526	0.0160912	0.0256152
BunnyPark	BUNNY	UK	0.138631	0.14534	0.131973	0.0975263	0.0873746	0.0418197	0.149213	0.097814
Cardington	CARDT	UK	0.218438	0.128169	0.0974104	0.0770557	0.115276	0.0618255	0.139544	0.185352
ChimneyMeadows	CHIMN	UK	0.0226521	-0.0260245	-0.00840262	-0.0462104	-0.041376	-0.0517696	0.0484279	-0.0711033
ChobhamCommon	CHOBH	UK	-0.167192	-0.214411	-0.219235	-0.239906	-0.289878	-0.274413	-0.238578	-0.370137
Cochno	COCHN	UK	-0.108	-0.0417884	-0.00142011	-0.0688188	-0.106808	-0.0457746	-0.0445879	-0.0508867
CocklePark	COCLP	UK	-0.0663333	-0.104968	-0.0425651		-0.112984		-0.0503338	-0.0780065
Crichton	CRICH	UK	-0.0663492	-0.157084	-0.0571707	-0.106319	-0.143333	-0.132395	-0.182681	-0.0870005
CwmGarw	CGARW	UK	-0.114302	-0.215368	-0.140031	-0.158087	-0.208401		-0.0927104	-0.163833
EasterBush	EASTB	UK	-0.0614977	-0.0496334	-0.0244399	-0.0384239	-0.0627034	-0.0543404	0.0114765	-0.0560151
Elmsett	ELMST	UK	0.00160571	-0.152264	-0.0969131		-0.0680788	-0.130762	-4.57393e-05	-0.0653674
Euston	EUSTN	UK	0.0719022	0.0671655	0.114254	0.148926	0.0952821	0.0896478	0.14741	-0.0016424
Fincham	FINCH	UK	0.074767	-0.0400242	0.00427073	0.0414484	-0.0191494	-0.0280481	0.0414933	-0.102298
GisburnForest	GISBN	UK	-0.196525	-0.231164	-0.215799	-0.257194	-0.294831	-0.296325	-0.279475	-0.187734
Glensaugh	GLENS	UK	-0.267544	-0.20253	-0.291644	-0.208211	-0.237583	-0.240839	-0.183593	-0.240865
Glenwherry	GLENW	UK	-0.204454		-0.186396	-0.25497	-0.2232	-0.232042	-0.172534	0.201722
Hadlow	HADLW	UK	-0.00181286	-0.0339047	-0.00530984	-0.0830245	-0.0885783	-0.0950317	-0.0276828	-0.0780916
HartwoodHome	HARTW	UK	-0.0550049	-0.207461	-0.162542	-0.205513	-0.179314	-0.23373	-0.0914484	0.248287
HarwoodForest	HARWD	UK	-0.380039	-0.404222	-0.384975	-0.439984	-0.465296	-0.458831	-0.487276	-0.383191
HenfaesFarm	HENFS	UK	-0.137378	-0.12663	-0.1022	-0.135027	-0.153054		-0.0424872	-0.104041
Heytesbury	HYBRY	UK	0.0359806	-0.0602645	0.00493041	-0.0383136	-0.00472585	-0.0432347	0.00248958	-0.0611443
Hillsborough	HILLB	UK	-0.0636147	-0.0576141	-0.0125192	-0.0906121	-0.0382921	-0.0991063	-0.0298554	-0.101762
HollinHill	HOLLN	UK	-0.062623	-0.0583027	-0.108576	-0.107146	-0.156954	-0.142514	-0.0341651	-0.120841
Loddington	LODTN	UK	-0.161471	-0.128072	-0.155265	-0.18976	-0.151937	-0.19151	-0.09758	-0.0607123
LullingtonHeath	LULLN	UK	0.106375	-0.0150436	-0.0161605	-0.0515089	-0.0226605		0.0251348	-0.0833618
MoorHouse	MOORH	UK	-0.28814	-0.23227	-0.224373	-0.288599	-0.32112	-0.313914	-0.306186	-0.268277
Morley	MORLY	UK	0.202364	-0.025194	0.0256192	0.0451019	0.00382911		0.047641	0.0691981
NorthWyke	NWYKE	UK	-0.119184	-0.111394	-0.12079	-0.140377	-0.193958	-0.170647	-0.0542363	-0.144602
Plynlimon	PLYNL	UK	-0.100596		-0.194504		-0.255207	-0.260611	-0.121559	-0.243402
PortonDown	PORTN	UK	0.0295857	-0.0525795	-0.00690817	-0.0520591	-0.0486634	-0.0511989	-0.0160372	-0.077592
Redhill	REDHL	UK	0.0876715	0.0674686	0.0538636	0.00879252	0.018571	-0.00860369	0.121709	0.0166309
Redmere	RDMER	UK	-0.050372	-0.444935	-0.390059	-0.364444	-0.406671	-0.399906	-0.415788	0.0401969
Riseholme	RISEH	UK	0.00321001	0.0289467	0.00589625	-0.0319908	0.0111454	-0.061587	0.0597663	-0.0521321
Rothamsted	ROTHD	UK	0.0752668	0.0626768	0.0322053	0.0110257	0.0307199	0.0128831	0.0365721	-0.00276292
Sheepdrove	SHEEP	UK	0.0927461	-0.031885	-0.0148972	-0.0516359	-0.0479017	-0.0588303	0.0422991	-0.0963849
Sourhope	SOURH	UK	-0.152956	-0.161706	-0.109164	-0.178756	-0.191967	-0.196133	-0.241349	0.286447
SpenFarm	SPENF	UK	0.0640612	0.0295155	0.00781497	0.0012333	-0.0174312	-0.0300481	0.0532389	-0.00684164
Stiperstones	STIPS	UK	-0.166759	-0.217002	-0.197131	-0.208119	-0.244235	-0.262431	-0.110225	-0.198785
Stoughton	STGHT	UK	0.123978	0.0371324	0.0146631	-0.0236294	-0.0341573	-0.0773218	0.0404098	0.0831534
TadhamMoor	TADHM	UK	-0.260369	-0.365997	-0.301109	-0.331122	-0.325509	-0.369838	-0.245594	-0.297168
TheLizard	LIZRD	UK	-0.184444		-0.226041		-0.295396		-0.172968	-0.274454
Waddesdon	WADDN	UK	0.0709433	-0.0267212	-0.0407136	-0.0745655	-0.0696764	-0.104083	0.00364856	0.0499666
Writtle	WRTTL	UK	0.0907288	-0.0183007	-0.0380602	-0.0704093	-0.0194068	-0.0508422	0.0183054	0.0621767
Aas	AAC001	Norway	-0.0015836	-0.0298638	0.055325	0.0972571	0.0338052	0.0377782	0.143785	0.126029
Acheleschwaig	ACC001	Germany	0.0388714	0.0288534	0.0110786	-0.0157388	-0.0452415	-0.058224	0.0535112	-0.022993
Agia	AGCK003	Greece	0.0671371	0.142713	0.0213255	0.0189136	0.0221953	-0.0261571	0.0816168	-0.0313041
Alento1	ALC001	Italy	0.0788687		0.0284662	-0.00580505	0.00362232		0.0409312	-0.0250817
Alento2	ALC002	Italy	0.0825495		0.0372899	0.00800429	0.0128514		0.0519394	-0.00527478
Calderona1	CAC001	Spain	0.0218115	0.00555878	0.00277048	-0.0431781	0.00727821		0.0346236	0.0417074
Crolles	CRC001	France	0.110335	-0.0250145	0.0192078	-0.000650261	0.0670012	-0.00593509	0.0816414	-0.0181392
Cunnersdorf	CUC001	Germany	0.111461	0.07277	0.0464747	0.0315403	0.0537484	-0.0019722	0.0881363	0.0394384
Derlo	DEC001	Poland	0.145653	0.046437	0.0271528	0.132663	0.0581431	0.042747	0.109259	0.0319471
Fendt	FEC001	Germany	-0.0194664	-0.0383335	-0.0653083	-0.0827946	-0.109824	-0.0987448	-0.0020157	-0.0757278
Fuerstensee	FSC001	Germany	0.191144	0.163215	0.127091	0.145759	0.113049	0.0955699	0.154542	0.0454227
Grosses Bruch	GBC001	Germany	0.0941668	-0.0204139	0.0294383	0.00546725	0.0320334	-0.00838809	0.0810949	0.040681
Gludsted	GLC001	Denmark	-0.0615856	-0.00750052	-0.0225791	0.00499331	-0.0833349	-0.0775426	0.104484	-0.127162
Harrild	HAC001	Denmark	-0.146262	-0.102508	-0.106198	-0.0774873	-0.172342	-0.158794	0.0242187	-0.193101
Hordorf	HDC001	Germany	0.0765082	-0.0323142	0.0149833	-0.0291616	0.01682	-0.00952901	0.0973533	0.0112578
Serrahn	HHC001	Germany	0.195859	0.169187	0.135078	0.154893	0.12361	0.108086	0.158588	-0.00170817
Hohes Holz	HOC001	Germany	0.147798	0.0386119	0.0882649	0.0629211	0.0905474	0.049837	0.138412	0.0886425
Jena	JEC001	Germany	0.155019	0.0761351	0.0994419	0.108654	0.0891285	0.0787708	0.151336	0.0506431
Merzenhausen	MEBCK001	Germany	0.0847598	-0.0394719	-0.0248373	0.0369628	0.0392214	0.0319424	0.0905751	0.0289863
Olocau	OLC001	Spain	0.0837892	0.0540969	0.0540805	0.00471336	0.0621797	0.0332188	0.0937274	0.0628948
Petzenkirchen	PEC001	Austria	0.00499729	-0.0345161	-0.0511968	-0.0477657	-0.0783787	-0.0733071	-0.04367	-0.0701603
Rietholzbach	RIC001	Switzerland	-0.0230533	-0.0494015	-0.0533404	-0.0790112	-0.101781	-0.0984966	0.00541176	-0.0886489
Rollesbroich1	ROC001	Germany	-0.013879	-0.0298633	-0.0799108	-0.0799972	-0.0790157	-0.0844006	0.012392	-0.090726
Rollesbroich2	ROC002	Germany	-0.0106406	-0.0239954	-0.0752487	-0.0757826	-0.0754461	-0.0807713	0.016747	-0.0822986
Schoeneseiffen	RUBCDKR001	Germany	0.0320017	0.0136943	-0.0383075	-0.023086	-0.0398124	-0.0433401	0.0533302	-0.0538903
Gevenich	RUBCK002	Germany	0.0724861	-0.0524732	-0.0410563	0.0231976	0.0232323	0.015591	0.0742305	0.0178275
Ruraue	RUBCK003	Germany	0.0423457	-0.0843912	-0.0715748	-0.00816537	-0.00649262	-0.0147626	0.0429796	-0.00594697
Wildenrath	RUBCK004	Germany	0.158765	0.00653682	0.0383015	0.10666	0.0857202	0.0470184	0.132076	0.0720844
Heinsberg	RUC004	Germany	0.0772191	-0.0755435	-0.0452422	0.0184231	0.00129484	-0.0349986	0.04869	0.0251523
Kall	RUC005	Germany	0.0220617	0.00437745	-0.045366	-0.0396962	-0.0579389	-0.084006	0.0251717	-0.048142
Aachen	RUC006	Germany	-0.035318	-0.185481	-0.15444	-0.091789	-0.0880407	-0.0983185	-0.0298043	-0.108169
Kleinhau1	RUC007	Germany	0.035568	0.0273181	-0.0233711	-0.0231434	-0.0278183	-0.0316471	0.0657809	-0.0614852
Saerheim	SAC001	Norway			0.128348		0.143606		0.188828	0.131991
Schaefertal1	SCC001	Germany	0.0774021	0.061239	0.0327452	0.00495505	0.0494437	-0.001263	0.131512	-0.00605467
Schaefertal4	SCC004	Germany	0.166321	0.153784	0.125007	0.0934945	0.140024	0.0889356	0.216626	0.0844495
Selhausen	SEC001	Germany	0.0227353	-0.0960454	-0.0814903	-0.0216409	-0.0234007	-0.0278039	0.0277438	-0.0380765
Toulouse	TOC001	France	0.186609	0.177334	0.111217	0.133671	0.113361	0.0830869	0.1781
Voulund	VOC001	Denmark	0.0476226	0.0918053	0.0895022	0.116292	0.022199	0.0337283	0.218989	-0.0133813
Wildacker	WAC001	Germany	0.201501	0.171557	0.144377	0.159588	0.12713	0.107672	0.168108	0.0112478
Wuestebach1	WUC001	Germany	-0.0537488	-0.0748097	-0.122908	-0.112945	-0.123584	-0.127227	-0.0324309	-0.145272
Wuestebach2	WUC002	Germany	-0.0558842	-0.0683326	-0.120707	-0.1063	-0.124017	-0.123526	-0.0285448	-0.148135
Baldry	AUS_SITE_001	Australia	0.0679015	0.00364616	0.0350683	0.0515918	0.0129645	0.0381385	0.103333
Daly	AUS_SITE_002	Australia	0.190254	0.118398	0.0968616	0.16725	0.142728	0.119755	0.171172	0.0999166
Gnangara	AUS_SITE_003	Australia	0.128938		0.0956418	0.155178	0.134602	0.16958	0.18273	0.040881
Robson	AUS_SITE_006	Australia	0.120795	0.0141776	0.0265184	-0.0558472	-0.0406428		0.112727	-0.0147375
Temora	AUS_SITE_007	Australia	0.0265177	-0.0439053	-0.0190296	-0.00270529	-0.0130926	-0.00486447	0.0549544	0.0061547
Tullochgorum	AUS_SITE_008	Australia	0.137935	0.0565282	0.120948	-0.0090651	0.0727234	0.11672	0.122922	0.146195
Tumbarumba	AUS_SITE_009	Australia	-0.0533177	-0.156524	-0.18955	-0.130872	-0.176687	-0.137454	-0.0338995	-0.197166
Weany Creek	AUS_SITE_010	Australia	0.0566215	0.0274729	0.0779394	0.0371791	0.0759539	0.049794	0.0592462	-0.0470333
Yanco	AUS_SITE_011	Australia	0.00223451	-0.0649049	-0.00424931	-0.0165703	-0.0118814	-0.0376856	-0.00470751	-0.0433239
Hamilton	AUS_SITE_015	Australia	-0.0320679	-0.066552	-0.0430383	-0.123385	-0.106772	-0.0495143	-0.071413	-0.0732186
Bishes	AUS_SITE_018	Australia	0.0820676	0.00646988	0.0762354	0.0244277	0.0597032	0.00589999	0.134324	-0.0260719

## Sheet: DataLength
CRNS site name	Station ID	Country	ERA5-Land	CFSv2	MERRA2	JRA55	GLDAS	CRA40	GLEAM	SMAPL4
Manitou Forest Tower	USA_SITE_004	USA	2055	2055	2055	2055	2055	2038	2055	1147
Marshall Colorado	USA_SITE_006	USA	2224	2224	2224	2224	2224	2208	2224	1205
Kendall	USA_SITE_010	USA	2232	2232	2232	2232	2232	2204	2232	823
Santa Rita Creosote	USA_SITE_011	USA	2456	2456	2456	2456	2456	2429	2456	758
SMAP-OK	USA_SITE_014	USA	2680	2680	2680	2680	2680	2651	2680	1108
ARM-1	USA_SITE_015	USA	2835	2835	2835	2835	2835	2808	2835	1271
Iowa Validation Site	USA_SITE_016	USA	2516	2516	2516	2516	2516	2492	2516	1283
San Pedro 2	USA_SITE_020	USA	1175	1175	1175	1175	1175	1148	1175	0
Desert Chaparral UCI	USA_SITE_023	USA	2876	2876	2876	2876	2876	2845	2876	1634
Coastal Sage UCI	USA_SITE_024	USA	3436	3436	3436	3436	3436	3404	3436	1981
Chestnut Ridge NOAA	USA_SITE_025	USA	786	786	786	786	786	770	786	0
Bondville	USA_SITE_026	USA	2785	2785	2785	2785	2785	2757	2785	1641
Morgan Monroe	USA_SITE_027	USA	788	788	788	788	788	773	788	0
Mozark	USA_SITE_028	USA	2929	2929	2929	2929	2929	2902	2929	1850
Neb Field 3	USA_SITE_029	USA	2758	2758	2758	2758	2758	2733	2758	1588
Harvard Forest	USA_SITE_030	USA	2282	2282	2282	2282	2282	2268	2282	1421
Howland	USA_SITE_031	USA	2013	2013	2013	2013	2013	1998	2013	1229
Tonzi Ranch	USA_SITE_032	USA	2831	2831	2831	2831	2831	2800	2831	1434
Soaproot	USA_SITE_033	USA	1244	1244	1244	1244	1244	1226	1244	325
P301	USA_SITE_034	USA	1798	1798	1798	1798	1798	1782	1798	972
Wind River	USA_SITE_035	USA	1050	1050	1050	1050	1050	1034	1050	210
Hauser Farm South	USA_SITE_037	USA	2015	2015	2015	2015	2015	1993	2015	775
Metolius	USA_SITE_038	USA	1777	1777	1777	1777	1777	1759	1777	965
Rosemount	USA_SITE_041	USA	2111	2111	2111	2111	2111	2097	2111	1350
Park Falls	USA_SITE_042	USA	1294	1294	1294	1294	1294	1278	1294	590
UMBS	USA_SITE_043	USA	1726	1726	1726	0	1726	0	1726	1024
Daniel Forest	USA_SITE_046	USA	1204	1204	1204	1204	1204	1194	1204	875
Tenderfoot Creek	USA_SITE_047	USA	846	846	846	846	846	834	846	391
Fort Peck	USA_SITE_048	USA	1529	1529	1529	1529	1529	1510	1529	736
JERC	USA_SITE_052	USA	1708	1708	1708	1708	1708	1679	1708	442
Savannah River	USA_SITE_053	USA	1282	1282	1282	1282	1282	1253	1282	173
Freeman Ranch	USA_SITE_057	USA	2272	2272	2272	2272	2272	2243	2272	1058
Sevilleta New Grass	USA_SITE_058	USA	1059	1059	1059	1059	1059	1033	1059	76
Lucky Hills	USA_SITE_060	USA	1100	1100	1100	1100	1100	1078	1100	295
Flag Wildfire	USA_SITE_061	USA	1535	1535	1535	1535	1535	1516	1535	766
Flag Ponderosa Pine	USA_SITE_062	USA	2298	2298	2298	2298	2298	2276	2298	1496
Beltsville	USA_SITE_065	USA	1467	1467	1467	1467	1467	1444	1467	73
Jornada Mixed Shrubland	USA_SITE_072	USA	1085	1085	1085	1085	1085	1059	1085	293
AliceHolt	ALIC1	UK	1708	1708	1708	1708	1708	1703	1708	1690
Balruddery	BALRD	UK	2029	2029	2029	2029	2029	2024	2029	1709
BickleyHall	BICKL	UK	1745	1745	1745	1745	1745	1740	1745	1683
BunnyPark	BUNNY	UK	1779	1779	1779	1779	1779	1774	1779	1715
Cardington	CARDT	UK	1646	1646	1646	1646	1646	1641	1646	1646
ChimneyMeadows	CHIMN	UK	2206	2206	2206	2206	2206	2200	2206	1715
ChobhamCommon	CHOBH	UK	1761	1761	1761	1761	1761	1756	1761	1726
Cochno	COCHN	UK	858	858	858	858	858	854	858	858
CocklePark	COCLP	UK	1585	1585	1585	0	1585	0	1585	1467
Crichton	CRICH	UK	1763	1763	1763	1763	1763	1758	1763	1644
CwmGarw	CGARW	UK	1220	1220	1220	1220	1220	0	1220	1220
EasterBush	EASTB	UK	1900	1900	1900	1900	1900	1895	1900	1677
Elmsett	ELMST	UK	1236	1236	1236	0	1236	1231	1236	1236
Euston	EUSTN	UK	1313	1313	1313	1313	1313	1308	1313	1313
Fincham	FINCH	UK	922	922	922	922	922	918	922	922
GisburnForest	GISBN	UK	1927	1927	1927	1927	1927	1922	1927	1699
Glensaugh	GLENS	UK	1978	1978	1978	1978	1978	1973	1978	1657
Glenwherry	GLENW	UK	1289	0	1289	1289	1289	1284	1289	1289
Hadlow	HADLW	UK	1108	1108	1108	1108	1108	1103	1108	1108
HartwoodHome	HARTW	UK	2008	2008	2008	2008	2008	2004	2008	1713
HarwoodForest	HARWD	UK	1582	1582	1582	1582	1582	1577	1582	1582
HenfaesFarm	HENFS	UK	1301	1301	1301	1301	1301	0	1301	1301
Heytesbury	HYBRY	UK	817	817	817	817	817	813	817	817
Hillsborough	HILLB	UK	1294	1294	1294	1294	1294	1289	1294	1294
HollinHill	HOLLN	UK	2064	2064	2064	2064	2064	2059	2064	1717
Loddington	LODTN	UK	1313	1313	1313	1313	1313	1308	1313	1313
LullingtonHeath	LULLN	UK	1754	1754	1754	1754	1754	0	1754	1649
MoorHouse	MOORH	UK	1780	1780	1780	1780	1780	1775	1780	1673
Morley	MORLY	UK	2056	2056	2056	2056	2056	0	2056	1735
NorthWyke	NWYKE	UK	1846	1846	1846	1846	1846	1842	1846	1702
Plynlimon	PLYNL	UK	1834	0	1834	0	1834	1829	1834	1688
PortonDown	PORTN	UK	1715	1715	1715	1715	1715	1712	1715	1612
Redhill	REDHL	UK	1393	1393	1393	1393	1393	1388	1393	1393
Redmere	RDMER	UK	1302	1302	1302	1302	1302	1301	1302	1253
Riseholme	RISEH	UK	1278	1278	1278	1278	1278	1273	1278	1278
Rothamsted	ROTHD	UK	1983	1983	1983	1983	1983	1978	1983	1734
Sheepdrove	SHEEP	UK	2232	2232	2232	2232	2232	2226	2232	1709
Sourhope	SOURH	UK	1652	1652	1652	1652	1652	1650	1652	1539
SpenFarm	SPENF	UK	1132	1132	1132	1132	1132	1127	1132	1132
Stiperstones	STIPS	UK	1863	1863	1863	1863	1863	1858	1863	1718
Stoughton	STGHT	UK	1589	1589	1589	1589	1589	1584	1589	1589
TadhamMoor	TADHM	UK	1876	1876	1876	1876	1876	1871	1876	1708
TheLizard	LIZRD	UK	1897	0	1897	0	1897	0	1897	1732
Waddesdon	WADDN	UK	2203	2203	2203	2203	2203	2197	2203	1712
Writtle	WRTTL	UK	909	909	909	909	909	905	909	909
Aas	AAC001	Norway	1186	1186	1186	1186	1186	1184	1186	1079
Acheleschwaig	ACC001	Germany	807	807	807	807	807	805	807	803
Agia	AGCK003	Greece	1433	1433	1433	1433	1433	1429	1433	1270
Alento1	ALC001	Italy	1526	0	1526	1526	1526	0	1526	1521
Alento2	ALC002	Italy	1750	0	1750	1750	1750	0	1750	1649
Calderona1	CAC001	Spain	1061	1061	1061	1061	1061	0	1061	1045
Crolles	CRC001	France	811	811	811	811	811	809	811	811
Cunnersdorf	CUC001	Germany	1791	1791	1791	1791	1791	1785	1791	1507
Derlo	DEC001	Poland	2251	2251	2251	2251	2251	2234	2251	1592
Fendt	FEC001	Germany	1386	1386	1386	1386	1386	1384	1386	1371
Fuerstensee	FSC001	Germany	1865	1865	1865	1865	1865	1865	1865	1486
Grosses Bruch	GBC001	Germany	2305	2305	2305	2305	2305	2299	2305	1890
Gludsted	GLC001	Denmark	2359	2359	2359	2359	2359	2334	2359	1637
Harrild	HAC001	Denmark	2232	2232	2232	2232	2232	2227	2232	1785
Hordorf	HDC001	Germany	1648	1648	1648	1648	1648	1642	1648	1379
Serrahn	HHC001	Germany	1238	1238	1238	1238	1238	1234	1238	1238
Hohes Holz	HOC001	Germany	2167	2167	2167	2167	2167	2161	2167	1813
Jena	JEC001	Germany	872	872	872	872	872	871	872	859
Merzenhausen	MEBCK001	Germany	3056	3056	3056	3056	3056	3027	3056	1877
Olocau	OLC001	Spain	1742	1742	1742	1742	1742	1736	1742	1591
Petzenkirchen	PEC001	Austria	1990	1990	1990	1990	1990	1988	1990	1538
Rietholzbach	RIC001	Switzerland	1965	1965	1965	1965	1965	1948	1965	1014
Rollesbroich1	ROC001	Germany	2895	2895	2895	2895	2895	2868	2895	1781
Rollesbroich2	ROC002	Germany	2553	2553	2553	2553	2553	2527	2553	1775
Schoeneseiffen	RUBCDKR001	Germany	1643	1643	1643	1643	1643	1639	1643	1613
Gevenich	RUBCK002	Germany	3013	3013	3013	3013	3013	2983	3013	1814
Ruraue	RUBCK003	Germany	3002	3002	3002	3002	3002	2972	3002	1899
Wildenrath	RUBCK004	Germany	2847	2847	2847	2847	2847	2818	2847	1898
Heinsberg	RUC004	Germany	3107	3107	3107	3107	3107	3078	3107	1993
Kall	RUC005	Germany	2797	2797	2797	2797	2797	2772	2797	1757
Aachen	RUC006	Germany	3007	3007	3007	3007	3007	2978	3007	1951
Kleinhau1	RUC007	Germany	1720	1720	1720	1720	1720	1717	1720	1680
Saerheim	SAC001	Norway	0	0	1115	0	1115	0	1115	995
Schaefertal1	SCC001	Germany	1843	1843	1843	1843	1843	1821	1843	1094
Schaefertal4	SCC004	Germany	2210	2210	2210	2210	2210	2188	2210	1216
Selhausen	SEC001	Germany	1927	1927	1927	1927	1927	1922	1927	1899
Toulouse	TOC001	France	1533	1533	1533	1533	1533	1505	1533	89
Voulund	VOC001	Denmark	2663	2663	2663	2663	2663	2637	2663	1863
Wildacker	WAC001	Germany	1990	1990	1990	1990	1990	1980	1990	1469
Wuestebach1	WUC001	Germany	2643	2643	2643	2643	2643	2624	2643	1652
Wuestebach2	WUC002	Germany	1758	1758	1758	1758	1758	1754	1758	1589
Baldry	AUS_SITE_001	Australia	1073	1073	1073	1073	1073	1045	1073	0
Daly	AUS_SITE_002	Australia	3719	3719	3719	3719	3719	3686	3719	1985
Gnangara	AUS_SITE_003	Australia	2279	0	2279	2279	2279	2259	2279	1345
Robson	AUS_SITE_006	Australia	3528	3528	3528	3528	3528	0	3528	1787
Temora	AUS_SITE_007	Australia	2345	2345	2345	2345	2345	2327	2345	1491
Tullochgorum	AUS_SITE_008	Australia	3231	3231	3231	3231	3231	3197	3231	1473
Tumbarumba	AUS_SITE_009	Australia	2993	2993	2993	2993	2993	2960	2993	1700
Weany Creek	AUS_SITE_010	Australia	3697	3697	3697	3697	3697	3664	3697	2002
Yanco	AUS_SITE_011	Australia	3733	3733	3733	3733	3733	3699	3733	2069
Hamilton	AUS_SITE_015	Australia	2157	2157	2157	2157	2157	2151	2157	1948
Bishes	AUS_SITE_018	Australia	1650	1650	1650	1650	1650	1644	1650	1440
