# Supplementary material for: Evaluation of reanalysis soil moisture products using cosmic ray neutron sensor observations across the globe
Source: Copernicus journal article supplement (doi:10.5194/hess-28-1999-2024), 2024-05-07
Supplement: Supplementary file [file hess-28-1999-2024-supplement-title-page.pdf › hess-28-1999-2024-supplement-title-page.pdf]

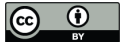

*Supplement of*

**Evaluation of reanalysis soil moisture products using cosmic ray  
neutron sensor observations across the globe**

**Yanchen Zheng et al.**

*Correspondence to:* Yanchen Zheng ([yanchen.zheng@bristol.ac.uk](mailto:yanchen.zheng@bristol.ac.uk))

- [hess-28-1999-2024-supplement-title-page.pdf](#)
- [CRNSsiteDataNEW1.xlsx](#)
- [StatisticMetricNEW1.xlsx](#)
- [Supplement.pdf](#)

The copyright of individual parts of the supplement might differ from the article licence.
